1     **ABA signaling prevents phosphodegradation of the**  
2     ***Arabidopsis* SR45 splicing factor to negatively**  
3     **autoregulate inhibition of early seedling development**

4     Rui Albuquerque-Martins<sup>1,2</sup>, Dóra Szakonyi<sup>1</sup>, James Rowe<sup>2</sup>, Alexander M.  
5     Jones<sup>2,\*</sup> and Paula Duque<sup>1,\*</sup>

6     <sup>1</sup> Instituto Gulbenkian de Ciência, 2780-156 Oeiras, Portugal

7     <sup>2</sup> Sainsbury Laboratory, University of Cambridge, Cambridge B2 1LR, UK

8     \* **Correspondence:** Paula Duque (duquep@igc.gulbenkian.pt); Alexander M. Jones  
9     (amj53@cam.ac.uk)

10    **Running Title:** ABA signaling stabilizes negative regulator SR45

11 **ABSTRACT**

12 Alternative splicing is a key posttranscriptional mechanism to expand the coding capacity of  
13 eukaryotic genomes. Although the functional relevance of this process remains poorly  
14 understood in plant systems, major modulators of alternative splicing called serine/arginine-  
15 rich (SR) proteins have been implicated in plant stress responses mediated by the abscisic acid  
16 (ABA) hormone. Loss of function of the *Arabidopsis thaliana* SR-like protein SR45, a *bona*  
17 *fide* splicing factor, has been shown to cause plant hypersensitivity to environmental cues and  
18 activation of the ABA pathway. Also, consistent with both animal and plant SR proteins being  
19 extensively and reversibly phosphorylated at their C-termini, ABA-induced changes in the  
20 phosphorylation status of SR45 have been reported.

21 Here, we show that *SR45* overexpression reduces *Arabidopsis* sensitivity to ABA during early  
22 seedling development. Moreover, exposure to ABA dephosphorylates SR45 at multiple amino  
23 acid residues and leads to accumulation of the protein via reduction of SR45 ubiquitination and  
24 proteasomal degradation. Using phosphomutant and phosphomimetic transgenic *Arabidopsis*  
25 lines, we demonstrate the functional relevance of ABA-mediated dephosphorylation of a single  
26 SR45 residue, T264, in antagonizing SR45 ubiquitination and degradation to promote its  
27 function as a repressor of seedling ABA sensitivity. Taken together, our results reveal a  
28 mechanism in which ABA signaling negatively autoregulates during early plant development  
29 via posttranslational control of the SR45 splicing factor.

30 **Key words:** Abscisic acid (ABA), alternative splicing, *Arabidopsis thaliana*, protein  
31 phosphorylation, SR proteins.

## 32 INTRODUCTION

33 Serine/arginine-rich (SR) proteins are members of a highly conserved family of RNA-binding  
34 factors that play important roles in mRNA splicing. These accessory spliceosomal proteins  
35 bind to *cis*-regulatory sequences in the precursor-mRNA (pre-mRNA), promoting early  
36 spliceosome assembly and influencing splice site selection. SR proteins are thus crucial in  
37 alternative splicing, a posttranscriptional mechanism that generates multiple transcripts from  
38 the same gene and has key biological relevance in eukaryotes, namely in developmental  
39 programs and stress response. Structurally, SR proteins present one or two N-terminal RNA  
40 recognition motifs (RRMs), responsible for binding transcripts, and an arginine/serine-rich  
41 (RS) protein-protein interaction domain at their C terminus that recruits core spliceosome  
42 components to splice sites. The RS domain is subjected to extensive reversible  
43 phosphorylation (reviewed in Duque, 2011), which in animal systems is known to be required  
44 for spliceosome assembly and has also been linked to mRNA export from the nucleus (Huang  
45 et al., 2004; Sanford et al., 2005) or in switching functions from splicing activator to repressor  
46 (Shi and Manley, 2007; Feng et al., 2008). In plant systems, SR proteins are being increasingly  
47 implicated in abiotic stress responses mediated by the abscisic acid (ABA) hormone (Carvalho  
48 et al., 2010; Chen et al., 2013; Xing et al., 2015; Albaqami et al., 2019; Laloum et al., 2021).  
49 The phytohormone ABA coordinates several developmental processes, such as seed dormancy,  
50 embryo maturation, seedling growth and greening, but is also pivotal in the response to  
51 environmental challenges. Sensing of osmotic or oxidative stress by plant cells leads to a  
52 massive increase in the levels of ABA, which is recognized by the PYR/PYL/RCAR  
53 (PYRABACTIN RESISTANCE/PYRABACTIN RESISTANCE-LIKE/REGULATORY  
54 COMPONENT OF ABA RECEPTORS) intracellular soluble receptors. Hormone-receptor  
55 binding facilitates the formation of a protein complex with PP2C (PROTEIN PHOSPHATASE  
56 2C) phosphatases, preventing the latter from inhibiting core ABA signaling protein kinases  
57 named SnRK2 [SUCROSE NON-FERMENTING 1 (SNF1)-RELATED PROTEIN KINASE  
58 2]. In the absence of PP2Cs, SnRK2s activate themselves by autophosphorylation and can then  
59 phosphorylate specific transcription factors (TFs), such as bZIPs (BASIC LEUCINE ZIPPER),  
60 to induce the expression of stress-responsive genes (reviewed in Finkelstein, 2013; Sah et al.,  
61 2016).

62 Phosphorylation-triggered protein degradation is an important strategy common to animal and  
63 plant systems (reviewed in Filipčík et al., 2017; Vu et al., 2018; Bhaskara et al., 2019). In  
64 plants, it is crucial not only for the regulation of light signaling (Al-Sady et al., 2006; Shen et

65 al., 2007; Yue et al., 2016) but also of several important players in the ABA pathway (Liu and  
66 Stone, 2010; Li et al., 2016; Chen et al., 2018; Li et al., 2018; Mizoi et al., 2019). The ubiquitin-  
67 proteasome system is a highly regulated mechanism to control protein levels in eukaryotic cells  
68 that targets for degradation proteins covalently linked to the polypeptide ubiquitin. For a  
69 protein to be recognized by the 26S proteasome, a chain of at least four ubiquitin monomers is  
70 needed, which is delivered to the substrate by an ATP-dependent enzymatic E1-E2-E3  
71 conjugation cascade (reviewed in Sadanandom et al., 2012). E3 ubiquitin ligases are the most  
72 numerous and diverse of the three groups of enzymes, being responsible for substrate  
73 recognition and specificity. Substrate phosphorylation is one of the signals recognized by some  
74 types of E3 ubiquitin ligase complexes (reviewed in Deshaies, 1999).

75 The most studied *Arabidopsis thaliana* SR-related protein is SR45, a *bona fide* splicing factor  
76 (Ali et al., 2007) that plays an established role in ABA responses (Carvalho et al., 2010; Xing  
77 et al., 2015; Carvalho et al., 2016; Albaqami et al., 2019). Having been classified as a canonical  
78 SR protein for many years, SR45 is currently considered an SR-like protein (Barta et al. 2010)  
79 due to its two RS domains that flank a single RRM (Golovkin and Reddy, 1999). The only  
80 *SR45* loss-of-function mutant described to date, *sr45-1*, exhibits a variety of developmental  
81 phenotypes, including reduced plant size, late and bushy inflorescences, delayed root growth,  
82 as well as abnormal leaf and flower morphology (Ali et al., 2007). Moreover, *sr45-1* mutant  
83 seedlings are hypersensitive to ABA and glucose (Carvalho et al., 2010; Carvalho et al., 2016)  
84 as well as to high salinity (Albaqami et al., 2019). Seven different splice variants of the *A.*  
85 *thaliana* *SR45* gene are annotated, but only two have been characterized: *SR45.1* and *SR45.2*,  
86 which despite exhibiting very similar expression patterns, fulfill different functions. While both  
87 variants are able rescue the mutant's glucose hypersensitivity (Carvalho et al., 2010), *SR45.2*  
88 rescues the root growth defect and *SR45.1* rescues the flower (Zhang and Mount, 2009), salt  
89 (Albaqami et al., 2019) and (partially) ABA (Xing et al., 2015) phenotypes.

90 Interestingly, the 4262 RNAs reported by Xing et al (2015) to bind SR45 include transcripts  
91 encoding 30% of all ABA signaling genes (Hauser et al., 2011). Furthermore, in addition to  
92 interacting with other splicing factors, including U1-70K (Golovkin and Reddy, 1999), U2AF  
93 (Day et al., 2012), three different U5 snRNP components and several SR proteins (Golovkin  
94 and Reddy, 1999; Tanabe et al., 2009; Zhang et al., 2014), SR45 has been found to interact  
95 with two proteins involved in ABA responses, the SNW/SKI-INTERACTING PROTEIN  
96 (SKIP) (Wang et al., 2012), a putative transcription factor conferring plant salt tolerance (Feng  
97 et al., 2015), and the SUA SUPPRESSOR OF ABI3-5 (SUA) protein (Mukhtar et al., 2011),  
98 which controls alternative splicing of *ABA-INSENSITIVE 3* (*ABI3*) (Sugliani et al., 2010).

99 Several reports of phosphorylation at specific SR45 residues in different plant tissues and stress  
100 conditions have been published (De La Fuente Van Bentem et al., 2006; De La Fuente Van  
101 Bentem et al., 2008; Umezawa et al., 2013; Wang et al., 2013; Zhang et al., 2014), with an  
102 early study showing that a LAMMER-type protein kinase, AFC2, can interact with and  
103 phosphorylate SR45 *in vitro* (Golovkin and Reddy, 1999). Moreover, Zhang et al. (2014)  
104 reported the relevance of phosphorylation of a single SR45 amino acid residue, T218, in both  
105 the regulation of flower development and alternative splicing of a direct mRNA target. On the  
106 other hand, a phosphoproteomics study found evidence of ABA-induced dephosphorylation of  
107 SR45 at a different residue, T264 (Wang et al., 2013). Given that SR45 transcript and splicing  
108 levels are reportedly unchanged by ABA treatment (Palusa et al., 2007; Cruz et al., 2014), these  
109 data strongly suggest that SR45 is regulated by ABA at the posttranslational level.  
110 How SR45 is posttranslationally regulated by ABA and related stresses remains largely  
111 unknown. Here we report that the *A. thaliana* SR45 protein accumulates and is  
112 dephosphorylated at several residues in response to ABA. We find that ABA-mediated  
113 dephosphorylation of the protein reduces its ubiquitination and targeting for proteasomal  
114 degradation, thus leading to SR45 stabilization under ABA conditions. Our results also  
115 demonstrate that the T264 SR45 residue is sufficient to influence phosphorylation-dependent  
116 proteasomal degradation of the protein and thereby its function as a negative regulator of the  
117 ABA pathway.

## 118 **RESULTS**

### 119 **Overexpression of the SR45 protein causes plant ABA hyposensitivity**

120 We previously showed that loss of function of the *Arabidopsis* SR45 gene leads to enhanced  
121 sensitivity to the ABA hormone at the cotyledon greening stage (Carvalho et al., 2010), with  
122 Xing et al. (2015) later reporting that overexpression of the SR45.1 splice variant partially  
123 rescues this ABA greening inhibition phenotype. Given that the SR45 gene produces at least  
124 two splice isoforms with distinct functions (Zhang and Mount, 2009; Albaqami et al., 2019),  
125 we decided to investigate the effect of expressing the genomic SR45 fragment on the ABA  
126 response of transgenic seedlings during early development. To this end, we cloned the gene's  
127 genomic fragment upstream of the eGFP sequence driven by either the endogenous SR45  
128 (pSR45::gSR45-eGFP) or the strong, constitutive UBQ10 (pUBQ10::gSR45-eGFP) promoter  
129 (Supplemental Figure 1). These two constructs were independently transformed into *sr45-1*

130 mutant plants (Ali et al., 2007), with two complementation (C1 and C2) and two overexpression  
131 (OX1 and OX2) transgenic lines being isolated for the pSR45::gSR45-eGFP and  
132 pUBQ10::gSR45-eGFP constructs, respectively.

133 As seen in Figure 1A, RT-qPCR analysis using primers specific for the *SR45* gene (see  
134 Supplemental Figure 1) revealed that the OX1 and OX2 lines express about 15- and 30-fold  
135 higher transcript levels than the Col-0 wild type, respectively, while in the C2 line expression  
136 is enhanced by only ~2.5 fold and C1 expresses similar levels to the wild type. As expected,  
137 transcript levels were barely detectable in the *sr45-1* knockout mutant. Similar results were  
138 obtained when primers specific for the *GFP* coding sequence were used (see Supplemental  
139 Figure 1) and the expression levels of the transgene were normalized to those of the C2  
140 complementation line (Figure 1A). Western blot analysis using anti-GFP antibodies showed  
141 that the relative differences in *SR45-GFP* transcript among the transgenic lines were matched  
142 at the protein level, as both overexpression lines showed highly elevated amounts of SR45-  
143 GFP when compared to the complementation lines, with C2 exhibiting slightly higher levels  
144 of the fusion protein than C1 (Figure 1B).

145 Phenotypical characterization of the transgenic lines revealed no defects in cotyledon  
146 development under control conditions and full rescue of the ABA hypersensitivity of the *sr45-1*  
147 mutant (Figure 1C). Moreover, all plant lines expressing significantly enhanced *SR45* mRNA  
148 levels (OX1, OX2 and C2) displayed reduced sensitivity to exogenous ABA. Notably, OX2  
149 was the transgenic line that displayed stronger ABA hyposensitivity, correlating with higher  
150 expression of the *SR45-GFP* transgene. Our results show that SR45's function as a negative  
151 regulator of ABA signaling during early seedling development is dependent on SR45 protein  
152 levels.

### 153 **ABA enhances SR45 protein levels**

154 Previous work indicates that the expression levels and splicing pattern of the *SR45* gene are  
155 unchanged by ABA (Palusa et al., 2007; Cruz et al., 2014), but it remains unknown whether  
156 SR45 protein levels are regulated by the phytohormone. To investigate this, we treated  
157 seedlings from a transgenic complementation line with 2  $\mu$ M ABA and followed SR45 protein  
158 levels for 3 hours by western blotting. Results revealed an evident accumulation of the SR45-  
159 GFP fusion protein over time in the ABA-treated samples, with the highest levels being  
160 detected after 180 minutes, while control samples harvested at the same timepoints showed no  
161 increase in SR45 protein levels (Figure 2A). Although endogenous *SR45* transcript levels are  
162 not ABA regulated (Palusa et al., 2007; Cruz et al., 2014), we confirmed that our transgene

163 was also not transcriptionally affected by ABA. As seen in Supplemental Figure 2A, RT-qPCR  
164 analysis of the *SR45-GFP* transcript in *SR45-GFP/sr45-1* seedlings revealed no changes in  
165 expression levels upon ABA treatment.

166 A similar trend of SR45-GFP accumulation was observed in transgenic seedlings treated with  
167 ABA when the fluorescence intensity was measured in primary roots by confocal microscopy.  
168 Figure 2B shows that addition of 10  $\mu$ M ABA to the sample's buffer increased the mean SR45-  
169 GFP fluorescence intensity per segmented nucleus by around 50% in 150 minutes,  
170 unequivocally demonstrating that the amounts of SR45 protein are upregulated by the ABA  
171 phytohormone.

### 172 **ABA dephosphorylates SR45 and enhances its levels in a SnRK2-dependent manner**

173 In a phosphoproteomics study by Wang et al. (2013), the phosphorylation levels of SR45 were  
174 reported to decrease in response to an ABA treatment. To verify whether SR45 is  
175 dephosphorylated by ABA in our conditions, we treated seedlings from a complementation line  
176 with 2  $\mu$ M ABA for 3 hours and compared the phosphorylation status of the SR45-GFP fusion  
177 protein with that from seedlings subjected to a mock treatment. As evident from the Phos-tag  
178 gel in Figure 3A, SR45 is markedly dephosphorylated in response to ABA. We next analyzed  
179 the phosphorylation levels of SR45 upon ABA treatment of transgenic plants expressing the  
180 pSR45::gSR45-eGFP construct in the *snrk2.2/3/6* triple mutant background. The SR45  
181 dephosphorylation induced by ABA was severely impaired by loss of SnRK2 function,  
182 indicating that the switch in the protein's phosphorylation status depends on ABA signaling  
183 (Figure 3A). These Phos-tag analyses revealed the occurrence of five different protein  
184 isoforms, while single bands had been detected in SDS-Page blots, thus showing that SR45 can  
185 be phosphorylated at multiple amino acid residues. We observed a clear SnRK2-dependent  
186 accumulation of the least phosphorylated form of the SR45 protein in response to ABA, with  
187 phospho-isoforms 3 and 4 accumulating in the ABA-treated *snrk2.2/3/6* line (Figure 3A).

188 Importantly, when SR45 protein levels were analyzed in the same samples by western blotting,  
189 the SR45 protein accumulation observed upon ABA treatment (see also Figure 2A) was  
190 abolished in the *snrk2.2/3/6* mutant background (Figure 3B), indicating that the ABA-induced  
191 rise in SR45 levels fully depends on ABA signaling downstream of SnRK2s and suggesting a  
192 putative link between dephosphorylation of the SR45 protein and its accumulation. As in the  
193 complementation line (see Supplemental Figure 2A), RT-qPCR analysis of *SR45-GFP*  
194 transcript levels in *SR45-GFP/snrk2.2/3/6* seedlings revealed no changes upon ABA treatment  
195 (Supplemental Figure 2B).

## 196 **ABA stabilizes SR45 by reducing protein ubiquitination and proteasomal degradation**

197 Having established that SR45 is ABA regulated at the posttranslational level, we hypothesized  
198 that the different amounts of SR45 protein observed under control and ABA conditions were  
199 due to distinct stability of the protein. To test this, we treated seedlings with the potent  
200 proteasome inhibitor MG132 before exposure to ABA and determination of SR45-GFP protein  
201 levels by western blotting (Figure 4A). Notably, pre-treatment with MG132 resulted in a  
202 significant increase of SR45 levels only in the absence of ABA, suppressing the difference in  
203 SR45 content between the control and ABA conditions (Figure 4A). This indicates increased  
204 targeting of SR45 for proteasomal degradation under control conditions, strongly suggesting  
205 that the ABA-dependent SR45 protein accumulation is due to increased stability of the SR45  
206 protein under ABA conditions.

207 To verify that the differences in SR45 stability correlate with different ubiquitination levels of  
208 the protein, we immunoprecipitated SR45-GFP (IP) from protein extracts of seedlings treated  
209 with ABA and checked for the presence of ubiquitin conjugates (Figure 4B). As expected, for  
210 the same amount of IP loaded in the SDS-Page gel, more immunoprecipitated SR45-GFP was  
211 retrieved in ABA-treated samples when compared to the control, but a higher accumulation of  
212 ubiquitin was detected in control compared to ABA pull-downs. Quantification of the ubiquitin  
213 signal and normalization to the amounts of immunoprecipitated SR45-GFP showed that the  
214 ubiquitination levels of the immunoprecipitated SR45-GFP are reduced by more than half  
215 under ABA conditions (Figure 4B). Immunoprecipitation of control 35S::GFP transgenic  
216 seedlings showed residual ubiquitin conjugates bound to GFP alone (Supplemental Figure 3).  
217 Together, these results show a higher degree of both SR45 ubiquitination and degradation by  
218 the ubiquitin-proteasome system under control conditions, with the protein being less  
219 ubiquitinated and more stable upon exposure to ABA.

## 220 **Phosphorylation of T264 residue controls SR45 protein ubiquitination and degradation**

221 Given that phosphorylation-dependent protein ubiquitination and degradation is a known  
222 mechanism to rapidly control protein levels in both animal and plant systems (reviewed in  
223 Filipčík et al., 2017; Vu et al., 2018; Bhaskara et al., 2019), we next asked whether SR45  
224 stability is dependent on the phosphorylation status of the protein. To address this question, we  
225 generated transgenic *Arabidopsis* lines expressing the pUBQ10::gSR45-eGFP construct  
226 mutated at a threonine (T) phosphoresidue reported by Wang et al. (2013). We changed this  
227 T264 residue either to an alanine (A), an amino acid that cannot be phosphorylated



228 (phosphomutant lines), or to aspartic acid (D), which is structurally similar to a phosphorylated  
229 threonine and thus mimics constitutive phosphorylation (phosphomimetic lines).

230 To investigate whether SR45 phosphorylation at the T264 residue affects ubiquitination of the  
231 protein, we immunoprecipitated SR45-GFP from protein extracts of overexpression (OX1),  
232 phosphomutant (PMut1) and phosphomimetic (PMim1) transgenic seedlings grown in control  
233 conditions and checked for the presence of ubiquitin in the IPs (Figure 5A). Quantification of  
234 the respective signals and calculation of the ubiquitin/SR45 ratio showed much higher  
235 ubiquitination levels in the pulldowns from the phosphomimetic line when compared with the  
236 overexpression and phosphomutant lines, with SR45-GFP immunoprecipitated from the latter  
237 line, in which T264 is never phosphorylated, showing the lowest degree of ubiquitination  
238 (Figure 5A). These results indicated that phosphorylation of the T264 residue promotes SR45  
239 ubiquitination.

240 To verify that T264 phosphorylation also results in rapid destabilization of SR45, we next  
241 followed degradation of the protein along time. As observed in Figure 5B, while in the control  
242 overexpression line SR45 decayed to about 60% of its initial levels in 15 minutes, the protein  
243 was noticeably more rapidly degraded in the phosphomimetic line, falling to nearly 20% in the  
244 same timeframe. By contrast, SR45 was markedly more stable in phosphomutant extracts,  
245 beginning to decay only after 30 minutes and reducing its amounts to only about half after an  
246 hour. Addition of the MG132 inhibitor to the protein extracts showed that the observed decay  
247 of the SR45 protein in all plant lines is proteasome dependent (Figure 5C). We thus concluded  
248 that T264 phosphorylation controls SR45 protein degradation via the ubiquitin-proteasome  
249 system — dephosphorylation of the protein at this residue results in reduced levels of  
250 ubiquitination and therefore enhanced protein stability.

## 251 **Phosphorylation of T264 residue controls ABA-induced SR45 protein accumulation and** 252 **plant ABA sensitivity**

253 Finally, we analyzed the effect of SR45 phosphorylation at the T264 residue on ABA  
254 responses. First, to test ABA-driven SR45 protein accumulation, we treated seedlings from the  
255 OX1 overexpression, the PMut1 phosphomutant and the PMim1 phosphomimetic transgenic  
256 lines with 2  $\mu$ M ABA and assessed SR45-GFP levels after 3 hours by western blotting. As  
257 shown in Figure 6A, the accumulation of SR45-GFP under ABA conditions observed in the  
258 C2 complementation line (see Figure 2 and Figure 3B) was reproduced with OX1, an  
259 overexpression line in which the transgene is driven by a different promoter, reinforcing  
260 posttranslational regulation of SR45 by ABA. By contrast, the ABA-induced SR45 protein

261 accumulation was abolished in both the transgenic line where SR45 cannot undergo  
262 phosphorylation at T264 (PMut1) and in the line where SR45 is constitutively phosphorylated  
263 at this residue (PMim1). We actually observed a slight decrease in the SR45-GFP protein levels  
264 upon ABA treatment in the phosphomutant and phosphomimetic lines (Figure 6A) consistent  
265 with reduced transcript levels (Supplemental Figure 4), possibly due to ABA downregulation  
266 of *UBQ10* promoter activity. This transcriptional downregulation of expression of the  
267 transgene by ABA was also observed in an independent set of phospho-transgenic lines, OX2,  
268 PMut2 and PMim2 (Supplemental Figure 5A), where again a rise in SR45 protein levels in  
269 response to ABA treatment was observed only in the overexpression line (Supplemental Figure  
270 5B). These results demonstrate that a switch in the phosphorylation status is required for SR45  
271 protein accumulation in response to ABA exposure, corroborating the notion that the ABA-  
272 induced increase in the SR45 protein depends on its dephosphorylation by the hormone.  
273 Having gained molecular insight into the effects of the T264 mutation on SR45, we then asked  
274 whether it would impact the plant's physiological response to ABA and affect sensitivity to the  
275 hormone during cotyledon greening. Figure 6B shows that phenotypical characterization of the  
276 transgenic OX1, PMut1 and PMim1 lines under control conditions revealed no differences in  
277 cotyledon development. However, while the OX1 and Pmut1 lines displayed a similar  
278 reduction in cotyledon greening when grown in ABA, the PMim1 phosphomimetic seedlings  
279 showed a higher sensitivity to ABA, despite the fact that this particular line expressed about  
280 twice the levels of the SR45-GFP mRNA (Figure 6B). A similar result was obtained when  
281 independent transgenic lines (OX2, PMut2 and PMim2) were isolated and analyzed, with the  
282 PMim2 phosphomimetic line being clearly the most sensitive to ABA (Supplemental Figure  
283 6). In this case, OX2 was less sensitive to ABA when compared to PMut2, most likely because  
284 of markedly higher *SR45-GFP* transcript levels in the former transgenic line (Supplemental  
285 Figure 6). In conclusion, the fact that SR45 phosphomimetic transgenic lines, in which the  
286 T264 residue is constitutively phosphorylated, exhibit enhanced ABA sensitivity indicates that  
287 SR45 depends on dephosphorylation to enhance its levels and exert its role as a negative  
288 regulator of ABA responses during early plant development.

## 289 **DISCUSSION**

290 We show here that overexpression of the *Arabidopsis SR45* gene causes reduced plant  
291 sensitivity to the phytohormone ABA. While Carvalho et al. (2010) observed complete rescue  
292 of the partially ABA-dependent *sr45-1* glucose phenotype upon overexpression of either the

293 *SR45.1* or *SR45.2* splice variants, Xing et al. (2015) found that overexpressing the *SR45.1* splice  
294 variant partially reverts *sr45-1* ABA hypersensitivity during early seedling development.  
295 Neither study had identified an ABA hyposensitive phenotype upon *SR45* overexpression,  
296 perhaps due to the fact that individual *SR45* splice variants were tested independently instead  
297 of the genomic fragment. Seven *SR45* transcripts are currently annotated and at least *SR45.1*  
298 and *SR45.2* are known to fulfill different biological roles (Zhang and Mount, 2009; Albaqami  
299 et al., 2019), rendering it likely that a combination of *SR45* splice forms is required for the  
300 protein's role as a negative regulator of the ABA pathway. Alternatively, the ability to reduce  
301 ABA sensitivity could arise from the use of different promoters to drive the *SR45* transgene.  
302 In our overexpression lines, the genomic construct is driven by the *UBQ10* promoter, while  
303 previous work used *35S*, whose activity can vary in different organs and under abiotic stress  
304 (Kiselev et al., 2021). Nevertheless, we recently also found opposite ABA and ABA-related  
305 phenotypes for the loss-of-function mutant and *Arabidopsis* lines expressing the SCL30a SR  
306 protein under the control of the 35S promoter (Laloum et al., 2021).

307 SR proteins are established phosphoproteins, and several phosphorylation residues have been  
308 annotated for *SR45*. Moreover, a phosphoproteomics study listed *SR45* as displaying reduced  
309 phosphorylation under ABA conditions (Wang et al. 2013). In agreement, we found that upon  
310 ABA exposure *SR45* is dephosphorylated at several residues in a SnRK2-dependent manner,  
311 indicating that ABA signaling downstream of SnRK2 kinases is either activating phosphatases  
312 that dephosphorylate *SR45* or deactivating kinases that phosphorylate *SR45* under control  
313 conditions. Interestingly, we detected ABA-induced accumulation of a specific *SR45* phospho-  
314 isoform (isoform 4 in Figure 3A) in the *snrk2.2/3/6* background, suggesting that this *SR45*  
315 (de)phosphorylation event is occurring either due to ABA signaling upstream of SnRK2s or  
316 independently of these core ABA pathway components. SnRK2-independent ABA signaling,  
317 in which PP2C phosphatases dephosphorylate other kinases activating different branches of  
318 ABA signaling, has been previously reported (Brandt et al., 2012). Our findings fit with the  
319 general model in which dephosphorylation negatively regulates ABA signaling (reviewed in  
320 Yang et al., 2017). In fact, several PP2C phosphatases are known to negatively regulate ABA  
321 signaling, with the corresponding loss-of-function mutants displaying ABA hypersensitive  
322 phenotypes (Merlot et al., 2001; Yoshida et al., 2006; Nishimura et al., 2007), as observed for  
323 *SR45*.

324 Importantly, we found that the *SR45* protein accumulates upon ABA treatment in a SnRK2-  
325 dependent manner and that the phosphorylation status of the protein controls this ABA-induced  
326 increase in *SR45* levels. Indeed, using phosphomutant and phosphomimetic lines in which the

327 SR45 protein is never phosphorylated or constitutive phosphorylation is mimicked at T264, a  
328 previously reported ABA-specific SR45 dephosphorylation residue (Wang et al., 2013), we  
329 show that: *i*) a switch in the SR45 phosphorylation status is required for ABA induction of  
330 SR45 protein accumulation, *ii*) dephosphorylation of the T264 residue upon ABA exposure  
331 results in both reduced ubiquitination levels and lower proteasomal degradation rates of SR45,  
332 and *iii*) SR45 phosphorylation at T264 enhances plant ABA sensitivity at the early seedling  
333 stage.

334 Our results demonstrate functional and physiological relevance for ABA-mediated  
335 posttranslational modification of an SR-related splicing factor that negatively regulates ABA  
336 responses during early plant development (Carvalho et al., 2010; Xing et al., 2015). We show  
337 that SR45 is phosphorylated under control conditions, with phosphorylation of a single residue  
338 being able to modulate the protein's ubiquitination levels and the amounts of SR45 that are  
339 targeted to degradation by the ubiquitin-proteasome system. Upon exposure to ABA,  
340 downstream signaling triggers SR45 dephosphorylation, thus reducing both the ubiquitination  
341 and degradation rates of the protein. Consistent with ABA stabilization of the SR45 protein,  
342 we also demonstrate that the protein's role as negative regulator of the ABA pathway is  
343 dependent on SR45 protein levels, pointing to ABA-induced SR45 accumulation as a  
344 mechanism of negative autoregulation of ABA signaling. Also in agreement with our model  
345 (Figure 7), SR45 phosphomimetic lines are more sensitive to ABA — when T264  
346 dephosphorylation is prevented, SR45 is degraded at higher rates resulting in lower amounts  
347 of SR45 protein and enhanced seedling sensitivity to ABA; given that SR45 is  
348 dephosphorylated by ABA, both the overexpression and the phosphomutant lines display a  
349 decreased ABA response.

350 In plants, protein phosphodegradation is crucial in the regulation of the phytochrome  
351 interacting factor 5 (PIF5) and PIF3 transcription factors involved in light signaling (Al-Sady  
352 et al., 2006; Shen et al., 2007; Yue et al., 2016), but has also been shown to regulate directly  
353 key ABA signaling components, including the *Arabidopsis* PYR/PYLs receptors (Chen et al.,  
354 2018), DEHYDRATION-RESPONSIVE ELEMENT-BINDING PROTEIN 2A (DREB2A)  
355 (Mizoi et al., 2019) and GUANINE NUCLEOTIDE EXCHANGE FACTOR 1 (RopGEF1) (Li  
356 et al., 2016; Li et al., 2018). Moreover, the RING-type E3 ligase KEEP ON GOING (KEG)  
357 regulates itself via ABA-dependent phosphodegradation, thereby stabilizing the ABA-  
358 INSENSITIVE 5 (ABI5) transcription factor, which is ubiquitinated by this E3 ligase (Liu and  
359 Stone, 2010). As for SR proteins, although their phosphorylation-dependent degradation has  
360 not yet been reported, a couple of studies in humans have looked into both phosphorylation

361 and proteasomal degradation of these RNA-binding proteins. Breig and Baklouti (2013) found  
362 that mutating an AKT signaling phosphorylation site has no effect on proteasomal degradation  
363 of the human SR protein SRSF5, while acetylation downregulates phosphorylation levels and  
364 promotes degradation of SRSF2, suggesting a link between acetylation and phosphorylation in  
365 regulating the levels of this SR protein (Edmond et al., 2011).  
366 In line with our findings, POLYUBIQUITIN 3 (UBQ3) is a reported interactor of the  
367 *Arabidopsis* SR45 (Kim et al., 2013). SR45 has also been reported to interact with the products  
368 of the At2g43770 and At1g10580 genes (Zhang et al., 2014), which are predicted to contain  
369 WD40 domains (Zhang et al., 2008). WD40 proteins function as potential substrate receptors  
370 of CUL4 E3 ubiquitin ligases (Lee et al., 2008), and it is interesting to note that two components  
371 of these E3 ligases are also reported negative regulators of ABA signaling (Lee et al., 2010).  
372 However, phosphorylated substrates are usually recognized by F-box proteins, which are part  
373 of the the Skp1-Cullin-F-box (SCF) complex, a different major type of E3 ubiquitin ligases  
374 (reviewed in Deshaies, 1999; Sadanandom et al., 2012). Further biochemical and genetic  
375 studies should allow the identification of both the kinases or phosphatases and the E3 ligase  
376 complexes regulating SR45 protein levels and unveil the precise molecular mechanisms  
377 leading to SR45 dephosphorylation and accumulation in response to ABA.

## 378 **METHODS**

### 379 **Plant Materials**

380 The *Arabidopsis thaliana* Columbia ecotype (Col-0) was used as the wild type in all  
381 experiments. The *sr45-1* knockout homozygous line was originally isolated in the Duque lab  
382 (Carvalho et al. 2010). The *snrk2.2/3/6* triple mutant was kindly provided by P.L. Rodríguez  
383 (Universidad Politécnica de Valencia, Spain).

### 384 **Generation of transgenic lines**

385 To generate the pSR45::gSR45-eGFP constructs, a fragment including the *SR45* promoter and  
386 its genomic sequence was isolated by PCR using primers annealing 1252 bp upstream and 2756  
387 bp downstream of the *SR45* start codon (Supplemental Table 1) and Col-0 DNA as a template.  
388 The *SR45* amplicon was subcloned into pGEM®-T Easy vector and incorporated in a GFP-  
389 tagged version of the binary pBA002 vector using the BspEI/PacI restriction sites. The  
390 construct was then used to transform the *Arabidopsis sr45-1* and *snrk2.2/3/6* mutants by the  
391 floral dip method (Clough and Bent, 1998) using *Agrobacterium tumefaciens* strain GV3101.

392 The full-length *SR45* fragment (excluding the stop codon) was amplified using primers with  
393 attB1/attB2 MultiSite Gateway sites (Supplemental Table 1). An entry clone was generated  
394 introducing the amplicon into a pDONR<sup>TM</sup>221 (Invitrogen) by recombination. The entry clone  
395 *SR45* in pDONR<sup>TM</sup>221 along with the vectors with the ubiquitin-10 promoter (*UBQ10*) in  
396 pDONR<sup>TM</sup>P4-P1R (Invitrogen) and eGFP in pDONR<sup>TM</sup>P2R-P3 (Invitrogen) was recombined  
397 with the destination vector pHm43GW to generate the pUBQ10::gSR45-eGFP overexpression  
398 construct according to Hartley et al. (2000). To generate *SR45* variants carrying the T264A  
399 and T264D mutations, site-directed mutagenesis was performed using *Pfu* DNA polymerase  
400 on *SR45* in the pDONR<sup>TM</sup>221 clone using different primer pairs (Supplemental Table 1). The  
401 resulting clones were further recombined with *UBQ10* in pDONR<sup>TM</sup>P4-P1R and *eGFP* in  
402 pDONR<sup>TM</sup>P2R-P3 in the pHm43GW destination vector as described above for the  
403 overexpression construct. Each construct was independently transformed into *sr45-1* mutant  
404 plants by agroinfiltration. All experiments with transgenic lines were conducted on isolated T3  
405 homozygous lines.

#### 406 **Plant growth**

407 For all phenotypical assays, seeds were surface sterilized for 10 minutes with 50 % (v/v) bleach  
408 and 0.02 % (v/v) Tween X-100 under continuous shaking and then washed three times in sterile  
409 water. Approximately 100 seeds per genotype were plated in triplicate on half-strength MS  
410 medium (0.5X MS basal salt mix Duchefa Biochemie, 0.5 mM *myo*-inositol, 2.5 mM MES,  
411 and 0.8 % agar, adjusted to pH 5.7) supplemented or not with 0.5  $\mu$ M ABA (S-ABA Duchefa  
412 Biochemie). The plates were wrapped in aluminum foil and stored at 4 °C for 3 days. After  
413 stratification, plates were transferred to a growth chamber set to continuous light conditions  
414 ( $100 \mu\text{mol m}^{-2} \text{s}^{-1}$ ) and 22 °C. The percentage of green seedlings was calculated over the total  
415 number of germinated seeds (displaying an emerged radicle) after 7 days. The average of the  
416 percentages was calculated per genotype and statistical differences between the genotypes were  
417 assessed using a Student's *t*-test.

418 For protein extraction, seedlings were grown for 5 days in 0.5X MS agar medium under  
419 continuous light conditions ( $100 \mu\text{mol m}^{-2} \text{s}^{-1}$ ) at 22 °C. The seedlings were then transferred  
420 to liquid 0.5X MS medium and grown with constant shaking for 48 hours in the same growth  
421 conditions. At this stage, control (ethanol) or 2  $\mu$ M ABA (S-ABA Duchefa Biochemie; ethanol  
422 stock) treatments were applied for specific amounts of time (0, 30, 60, 90 or 180 minutes). To  
423 inhibit proteasomal degradation, 50  $\mu$ M MG132 (Sigma, C2211; DMSO stock) or DMSO

424 (control) were added 60 minutes prior to the onset of the ABA treatment. The plant material  
425 was harvested and frozen at -80 °C for protein extraction.

426 To compare the RNA levels of all transgenic lines, plants were also grown for 5 days in 0.5X  
427 MS agar medium under continuous light and transferred to liquid 0.5X MS medium for 48  
428 hours with constant shaking. To test for transcriptional ABA regulation, 2-day-old seedlings  
429 were grown on a paper filter and placed on 0.5X MS agar medium plates under continuous  
430 light conditions. The seedlings were then transferred to 0.5X MS agar medium supplemented  
431 with 1 μM ABA or ethanol (control) and grown for 180 minutes before harvesting.

### 432 **RNA Extraction and RT-qPCR Analyses**

433 Total RNA was extracted from *Arabidopsis* seedlings using the innuPREP Plant RNA kit  
434 (Analytik Jena BioSolutions). All RNA samples were treated with DNaseI (Promega) and  
435 cDNA was synthesized using the SuperScript™ III Reverse Transcriptase (Invitrogen) and  
436 oligo (dT)<sub>18</sub> primers. RT-qPCR was performed using an ABI QuantStudio-384 instrument  
437 (Applied Biosystems) and the Luminaris Color HiGreen qPCR Master Mix, high ROX  
438 (Thermo Scientific) on 2.5 μL of cDNA (diluted 1:20) per 10-μL reaction volume, containing  
439 300 nM of each specific primer (Supplemental Table 1). Cycle threshold (Ct) values were  
440 adjusted for each gene in each biological replicate. Relative expression values were generated  
441 for the target gene using a log<sub>2</sub> transformation, normalizing the gene Ct values to the  
442 housekeeping control gene *PEX4* (*PEROXIN4*), according to Vandesompele et al. (2002). The  
443 average value of the relative expression of each gene in all the biological replicates was  
444 calculated per sample. Statistical differences between the average relative expressions of each  
445 sample were inferred using a Student's *t*-test.

### 446 **Microscopic Analyses**

447 For confocal microscopy analysis, *sr45-1* seedlings expressing the pSR45::gSR45-eGFP  
448 construct were mounted on slides in a vacuum grease/coverlip reservoir as described in Rizza  
449 et al. (2019) in 0.25X MS. Seedlings were imaged for an hour of pretreatment, and then a  
450 buffer exchange was performed to 0.25X MS + 10 μM ABA and imaging was resumed.  
451 Confocal images were acquired on an upright Leica SP8 microscope using a HC PL APO CS2  
452 20x/0.75 DRY objective. The emission laser and detection windows were as follows: GFP  
453 - 488nm laser, 493nm - 568nm detection; Gain: 200. A custom Fiji (Schneider et al., 2012;  
454 Rueden et al., 2017) plugin, 'Simple\_auto\_segmentation.py', was developed using CLIJ2  
455 (Haase et al., 2020) to perform segmentation and fluorescence quantification per nucleus.

456 Source code and installation instructions are available at [https://github.com/JimageJ/ImageJ-](https://github.com/JimageJ/ImageJ-Tools)  
457 [Tools](#). This preprocesses images for segmentation with difference of Gaussian and tophat filters  
458 followed by thresholding using Otsu's method. A watershed and connected components  
459 analysis are used to split and identify objects in the threshold image. Any objects lost in  
460 watershed are added back in and a non-zero dilation and multiplication is used to expand the  
461 object map into the original binary map to produce the final segmentation.

## 462 **Protein Extraction, Western Blot and Phos-tag Assays**

463 Frozen 7-day-old *Arabidopsis* seedlings subjected to prior treatments were ground with a  
464 mortar and pestle under liquid nitrogen. Total protein was extracted in an extraction buffer  
465 containing 50 mM Tris-HCl, 150 mM NaCl, 1 mM EDTA, 0.5% Triton™ X-100(Sigma-  
466 Aldrich), 1 tablet of Complete Protease Inhibitor Cocktail (Roche) and 1 tablet of PHOSSTOP  
467 (Roche). The extract was centrifuged at 18,000 g for 10 minutes at 4 °C and the protein content  
468 of the supernatant determined using the Bradford method (Bio-Rad) in a spectrophotometer  
469 measuring the absorbance at 595 nm and then eluted in Laemmli 2X buffer with 8 % β-  
470 mercaptoethanol (95 °C for 5 minutes). After determining the protein concentration in each  
471 sample, equal amounts of protein were resolved in 8 % SDS/polyacrylamide gels. The proteins  
472 were then transferred to PVDF membranes (Immobilon-P; Millipore) and subsequently  
473 blocked with 5 % nonfat dry milk for 2 hours. The membranes were probed overnight at 4 °C  
474 with anti-GFP primary antibodies (Roche 11814460001; 1:1000) and then with anti-  
475 mouse peroxidase-conjugated secondary antibodies (Jackson ImmunoResearch # 115-035-146;  
476 diluted 1:4000) for 2 hours at room temperature. All antibodies were diluted in TBS buffer (25  
477 mM Tris-HCl pH 7.4, and 137 mM NaCl) supplemented with 1 % nonfat dry milk. After  
478 incubating with the antibodies, the membranes were washed with TBS containing 0.05 %  
479 Tween® 20 (Sigma-Aldrich) for 40 minutes. The peroxidase activity associated with the  
480 membrane was visualized by enhanced chemiluminescence. The intensity of the protein bands  
481 was quantified using ImageJ software, normalizing protein levels to the Rubisco large subunit  
482 visualized in membranes stained with Ponceau (0.1 % Ponceau S Sigma-Aldrich in 5 % acetic  
483 acid). The statistical differences between the average protein levels of each sample were  
484 inferred using a Student's *t*-test.

485 To separate the different SR45 phospho-isoforms under control and ABA conditions, Mn<sup>2+</sup>-  
486 Phos-tag™ SDS-PAGE was performed. An equivalent amount of total protein was loaded and  
487 resolved in a 6 % acrylamide gel with 50 μM MnCl<sub>2</sub> and 25 μM pf Phos-tag™ (Wako Pure  
488 Chemicals Industries). Each sample was supplemented with 1:10 MnCl<sub>2</sub> to minimize the



489 “smiling” effect before the run. The gel was washed twice for 20 minutes with transfer buffer  
490 (25 mM Tris, 192 mM glycine, 0.1 %, SDS and 20 % ethanol) supplemented with 1mM EDTA,  
491 followed by an additional wash of regular transfer buffer for 10 minutes. The proteins were  
492 wet-transferred to a PVDF membrane (Immobilon-P; Millipore) for 2.5 hours at 100 V. The  
493 membrane was blocked and probed with antisera as mentioned above.

#### 494 **SR45-GFP Immunoprecipitation and Protein Degradation Assay**

495 Total protein was extracted from approximately 100 mg of 7-day-old *Arabidopsis* seedlings  
496 with 800  $\mu$ L of the extraction buffer described above. The extract was centrifuged at 18,000 *g*  
497 for 10 minutes at 4 °C and the supernatant incubated for 1 hour at 4 °C with continuous  
498 agitation with 100  $\mu$ L of Sepharose beads (Sigma-Aldrich). The extract was then further  
499 centrifuged at 500 *g* for 2 minutes, and the input fraction was removed and eluted in Laemmli  
500 2x buffer for 5 minutes at 95 °C. After incubation with 20  $\mu$ L of GFP-Trap<sup>®</sup> Agarose beads  
501 (ChromoTek) for 1.5 h, the beads were washed 3 times with cold extraction buffer for 10  
502 minutes each wash and the proteins eluted from the beads in 30  $\mu$ L of Laemmli 2x buffer for 5  
503 minutes at 95 °C. Finally, 15  $\mu$ L of the immunoprecipitate and 20  $\mu$ L of the input fraction were  
504 loaded in separate SDS-Page gels, with blotting performed as described above. For detection  
505 of UBIQ conjugates, the membranes were stripped for 15 minutes with Western BLoT Stripping  
506 Buffer (Takara) following the manufacturer’s instructions and reprobed with Ubiquitin11  
507 (Agrisera AS08307; 1/10000) and anti-rabbit peroxidase-conjugated secondary antibodies  
508 (Amersham Pharmacia; diluted 1/10000). The intensity of the protein bands was quantified  
509 using ImageJ software. Statistical differences between the average ratios of each sample were  
510 inferred using a Student’s *t*-test.

511 The degradation rate of the SR45 protein was assessed in protein extracts from 7-day-old  
512 seedlings grown in control conditions supplemented with 50  $\mu$ M MG132 or DMSO (control)  
513 and left to degrade at room temperature for 0, 15, 30 and 60 minutes. The protein extracts were  
514 loaded in an SDS-Page gel and blotting performed as described above.

#### 515 **SUPPLEMENTAL INFORMATION**

##### 516 **Supplemental Figure 1. Constructs for generation of the overexpression and** 517 **complementation transgenic lines.**

518 Schematic representation of the pUBQ10::gSR45-eGFP and pSR45::gSR45-eGFP constructs.  
519 The *UBQ10* and the *SR45* promoters are shown in orange and blue, respectively, and the eGFP

520 sequence in green. Exons are shown in black, the 5' UTR in white, and introns are represented  
521 by black lines. The cloning scar sequences are shown immediately downstream of the promoter  
522 and/or of the last exon. The location of the primers used to detect the transgene is indicated by  
523 the arrow pairs.

524 **Supplemental Figure 2. Effect of ABA and loss of SnRK2 function on *SR45-GFP***  
525 **transcript levels.**

526 RT-qPCR analysis of *SR45-GFP* transcript levels in 2-day-old seedlings of the C2  
527 complementation (*SR45-GFP/sr45-1*) line (**A**) or of a transgenic line expressing the  
528 pSR45::gSR45-GFP construct in the *snrk2.2/3/6* mutant background (*SR45-GFP/snrk2.2/3/6*)  
529 (**B**) treated for 180 minutes with 1  $\mu$ M ABA, using *PEX4* as a reference gene and primers  
530 annealing to the *GFP* sequence (see Supplemental Figure 1). Control samples (set to 1) were  
531 treated with the equivalent volume of the solvent of the ABA solution (ethanol). Results  
532 represent means  $\pm$  SE ( $n = 3$ ), with no statistically significant differences being found between  
533 treatments for each set of primers ( $P > 0.05$ ; Student's *t*-test).

534 **Supplemental Figure 3. Ubiquitination levels of the GFP protein.**

535 Protein gel blot analysis of the GFP protein immunoprecipitated from extracts of 7-day-old  
536 seedlings of a 35S::GFP transgenic line treated for 180 minutes with 2  $\mu$ M ABA using  $\alpha$ -GFP  
537 (IP) or  $\alpha$ -UBQ11 (Co-IP) antibodies. Control samples were treated with the equivalent volume  
538 of the solvent of the ABA solution (ethanol). Equal volumes of both the input fraction (Input)  
539 and the IP were loaded.

540 **Supplemental Figure 4. Effect of ABA on *SR45-GFP* transcript levels in the OX1, PMut1**  
541 **and PMim1 transgenic lines.**

542 RT-qPCR analysis of *SR45-GFP* transcript levels in 2-day-old seedlings of the OX1  
543 overexpression (pUBQ10::*SR45-GFP/sr45-1*), PMut1 phosphomutant (pUBQ10::*SR45-*  
544 *GFP\_T264A/sr45-1*) and PMim1 phosphomimetic (pUBQ10::*SR45-GFP\_T264D/sr45-1*)  
545 transgenic lines treated for 180 minutes with 1  $\mu$ M ABA, using *PEX4* as a reference gene and  
546 primers annealing to the *GFP* sequence (see Supplemental Figure 1). Control samples (set to  
547 1) were treated with the equivalent volume of the solvent of the ABA solution (ethanol).  
548 Results represent means  $\pm$  SE ( $n = 3$ ), with different letters indicating statistically significant  
549 differences between treatments for each genotype ( $P > 0.05$ ; Student's *t*-test).

550 **Supplemental Figure 5. Effect of ABA on *SR45-GFP* transcript and protein levels in the**  
551 **OX2, PMut2 and PMim2 transgenic lines.**

552 (A) RT-qPCR analysis of *SR45-GFP* transcript levels in 2-day-old seedlings of the OX2  
553 overexpression (pUBQ10::*SR45-GFP/sr45-1*), PMut2 phosphomutant (pUBQ10::*SR45-*  
554 *GFP\_T264A/sr45-1*) and PMim2 phosphomimetic (pUBQ10::*SR45-GFP\_T264D/sr45-1*)  
555 transgenic lines treated for 180 minutes with 1  $\mu$ M ABA, using *PEX4* as a reference gene and  
556 primers annealing to the *GFP* sequence (see Supplemental Figure 1). Control samples (set to  
557 1) were treated with the equivalent volume of the solvent of the ABA solution (ethanol).  
558 Results represent means  $\pm$  SE ( $n = 3$ ), with different letters indicating statistically significant  
559 differences between treatments for each genotype ( $P > 0.05$ ; Student's *t*-test).

560 (B) Protein gel blot analysis using  $\alpha$ -GFP antibodies of the *SR45-GFP* fusion protein in 7-day-  
561 old overexpression (OX2), phosphomutant (PMut2) and phosphomimetic (PMim2) transgenic  
562 seedlings treated for 180 minutes with 2  $\mu$ M ABA. Control samples were treated with the  
563 equivalent volume of the solvent of the ABA solution (ethanol), and a total of 20 ng of protein  
564 were loaded per sample. Bands were quantified and relative protein levels determined using  
565 the Ponceau loading control as a reference, with results representing means  $\pm$  SE ( $n = 3$ ), control  
566 conditions set to 1, and different letters indicating statistically significant differences between  
567 treatments for each genotype ( $P < 0.05$ ; Student's *t*-test).

568 **Supplemental Figure 6. Physiological phenotypes of the OX2, PMut2 and PMim2**  
569 **transgenic lines.**

570 Cotyledon greening percentages of 7-day-old seedlings of the OX2 overexpression, PMut2  
571 phosphomutant and PMim2 phosphomimetic transgenic lines grown under control conditions  
572 or in the presence of 0.5  $\mu$ M ABA, with representative images of ABA conditions (scale bar =  
573 1 cm), and RT-qPCR analysis of *SR45-GFP* transcript levels in the same seedlings (control  
574 conditions), using *PEX4* as a reference gene and primers annealing to the *GFP* sequence (see  
575 Supplemental Figure 1). Results represent means  $\pm$  SE ( $n = 3$ ), and different letters indicate  
576 statistically significant differences between genotypes ( $P > 0.05$ ; Student's *t*-test).

577 **Supplemental Table 1. Sequences of the Primers Used in this study**

578 **FUNDING**

579 This work was funded by Fundação para a Ciência e a Tecnologia (FCT) through Grants BIA-  
580 FBT/31018/2017 and PTDC/ASP-PLA/2550/2021 as well as PhD Fellowship  
581 PD/BD/128401/2017 awarded to R.A.-M.. Funding from the research unit GREEN-it  
582 “Bioresources for Sustainability” (UIDB/04551/2020) is also acknowledged. AMJ and JR were  
583 funded by the Gatsby Charitable Foundation and BBSRC (BB/P018572/1).

#### 584 **AUTHOR CONTRIBUTIONS**

585 R.A.-M., A.M.J. and P.D. designed the research, R.A.-M., D.S. and J.R. performed the  
586 experiments, and A.M.J. and P.D. supervised the work. R.A.-M. and P.D. wrote the manuscript  
587 and prepared the figures and tables. All authors contributed to the interpretation of results,  
588 critically reviewed the manuscript and approved its final version.

#### 589 **ACKNOWLEDGMENTS**

590 We thank P.L. Rodríguez for the *snrk2.2/3/6* triple mutant, L. Margalha for expert biochemistry  
591 advice, and V. Nunes for excellent plant care at the Instituto Gulbenkian de Ciência (IGC) Plant  
592 Facility.

#### 593 **REFERENCES**

- 594 **Al-Sady, B., Ni, W., Kircher, S., Schäfer, E., and Quail, P. H.** (2006). Photoactivated  
595 Phytochrome Induces Rapid PIF3 Phosphorylation Prior to Proteasome-Mediated  
596 Degradation. *Mol. Cell* **23**:439–446.
- 597 **Albaqami, M., Laluk, K., and Reddy, A. S. N.** (2019). The Arabidopsis splicing regulator  
598 SR45 confers salt tolerance in a splice isoform-dependent manner. *Plant Mol. Biol.*  
599 **100**:379–390.
- 600 **Ali, G. S., Palusa, S. G., Golovkin, M., Prasad, J., Manley, J. L., and Reddy, A. S. N.**  
601 (2007). Regulation of plant developmental processes by a novel splicing factor. *PLoS One*  
602 **2**.
- 603 **Bhaskara, G. B., Wong, M. M., and Verslues, P. E.** (2019). The flip side of phospho-  
604 signalling: Regulation of protein dephosphorylation and the protein phosphatase 2Cs.  
605 *Plant Cell Environ.* **42**:2913–2930.
- 606 **Brandt, B., Brodsky, D. E., Xue, S., Negi, J., Iba, K., Kangasjärvi, J., Ghassemian, M.,**  
607 **Stephan, A. B., Hu, H., and Schroeder, J. I.** (2012). Reconstitution of abscisic acid

608 activation of SLAC1 anion channel by CPK6 and OST1 kinases and branched ABI1 PP2C  
609 phosphatase action. *Proc. Natl. Acad. Sci. U. S. A.* **109**:10593–10598.

610 **Breig, O., and Baklouti, F.** (2013). Proteasome-Mediated Proteolysis of SRSF5 Splicing  
611 Factor Intriguingly Co-occurs with SRSF5 mRNA Upregulation during Late Erythroid  
612 Differentiation. *PLoS One* **8**.

613 **Carvalho, R. F., Carvalho, S. D., and Duque, P.** (2010). The Plant-Specific SR45 Protein  
614 Negatively Regulates Glucose and ABA Signaling during Early Seedling Development in  
615 Arabidopsis. *Plant Physiol.* **154**:772–783.

616 **Carvalho, R. F., Szakonyi, D., Simpson, C. G., Barbosa, I. C. R., Brown, J. W. S., Baena-  
617 González, E., and Duque, P.** (2016). The Arabidopsis SR45 Splicing Factor, a Negative  
618 Regulator of Sugar Signaling, Modulates SNF1-Related Protein Kinase 1 Stability. *Plant  
619 Cell* **28**:1910–1925.

620 **Chen, T., Cui, P., Chen, H., Ali, S., Zhang, S., and Xiong, L.** (2013). A KH-Domain RNA-  
621 Binding Protein Interacts with FIERY2/CTD Phosphatase-Like 1 and Splicing Factors  
622 and Is Important for Pre-mRNA Splicing in Arabidopsis. *PLoS Genet.* **9**:1–14.

623 **Chen, H. H., Qu, L., Xu, Z. H., Zhu, J. K., and Xue, H. W.** (2018). EL1-like Casein Kinases  
624 Suppress ABA Signaling and Responses by Phosphorylating and Destabilizing the ABA  
625 Receptors PYR/PYLs in Arabidopsis. *Mol. Plant* **11**:706–719.

626 **Clough, S. J., and Bent, A. F.** (1998). Floral dip: A simplified method for Agrobacterium-  
627 mediated transformation of Arabidopsis thaliana. *Plant J.* **16**:735–743.

628 **Cruz, T. M. D., Carvalho, R. F., Richardson, D. N., and Duque, P.** (2014). Abscisic acid  
629 (ABA) regulation of arabidopsis SR protein gene expression. *Int. J. Mol. Sci.* **15**:17541–  
630 17564.

631 **Day, I. S., Golovkin, M., Palusa, S. G., Link, A., Ali, G. S., Thomas, J., Richardson, D. N.,  
632 and Reddy, A. S. N.** (2012). Interactions of SR45, an SR-like protein, with spliceosomal  
633 proteins and an intronic sequence: Insights into regulated splicing. *Plant J.* **71**:936–947.

634 **De La Fuente Van Bentem, S., Anrather, D., Roitinger, E., Djamei, A., Hufnagl, T., Barta,  
635 A., Csaszar, E., Dohnal, I., Lecourieux, D., and Hirt, H.** (2006). Phosphoproteomics  
636 reveals extensive in vivo phosphorylation of Arabidopsis proteins involved in RNA  
637 metabolism. *Nucleic Acids Res.* **34**:3267–3278.

638 **De La Fuente Van Bentem, S., Anrather, D., Dohnal, I., Roitinger, E., Csaszar, E., Joore,  
639 J., Buijnink, J., Carreri, A., Forzani, C., Lorkovic, Z. J., et al.** (2008). Site-specific

- 640 phosphorylation profiling of arabidopsis proteins by mass spectrometry and peptide chip  
641 analysis. *J. Proteome Res.* **7**:2458–2470.
- 642 **Deshaies, R. J.** (1999). SCF and Cullin/Ring H2-based ubiquitin ligases. *Annu. Rev. Cell Dev.*  
643 *Biol.* **15**:435–467.
- 644 **Duque, P.** (2011). A role for SR proteins in plant stress responses. *Plant Signal. Behav.* **6**:49–  
645 54.
- 646 **Edmond, V., Moysan, E., Khochbin, S., Matthias, P., Brambilla, C., Brambilla, E.,**  
647 **Gazzeri, S., and Eymin, B.** (2011). Acetylation and phosphorylation of SRSF2 control  
648 cell fate decision in response to cisplatin. *EMBO J.* **30**:510–523.
- 649 **Feng, Y., Chen, M., and Manley, J. L.** (2008). Phosphorylation switches the general splicing  
650 repressor SRp38 to a sequence-specific activator. *Nat. Struct. Mol. Biol.* **15**:1040–1048.
- 651 **Feng, J., Li, J., Gao, Z., Lu, Y., Yu, J., Zheng, Q., Yan, S., Zhang, W., He, H., Ma, L., et**  
652 **al.** (2015). SKIP Confers Osmotic Tolerance during Salt Stress by Controlling Alternative  
653 Gene Splicing in Arabidopsis. *Mol. Plant* **8**:1038–1052.
- 654 **Filipčík, P., Curry, J. R., and Mace, P. D.** (2017). When Worlds Collide—Mechanisms at  
655 the Interface between Phosphorylation and Ubiquitination. *J. Mol. Biol.* **429**:1097–1113.
- 656 **Finkelstein, R.** (2013). Abscisic Acid Synthesis and Response. *Arab. B.* **11**:e0166.
- 657 **Golovkin, M., and Reddy, A. S. N.** (1999). An SC35-like protein and a novel serine/arginine-  
658 rich protein interact with Arabidopsis U1-70K protein. *J. Biol. Chem.* **274**:36428–36438.
- 659 **Haase, R., Royer, L. A., Steinbach, P., Schmidt, D., Dibrov, A., Schmidt, U., Weigert, M.,**  
660 **Maghelli, N., Tomancak, P., Jug, F., et al.** (2020). CLIJ: GPU-accelerated image  
661 processing for everyone. *Nat. Methods* **17**:5–6.
- 662 **Hartley, J. L., Temple, G. F., and Brasch, M. A.** (2000). DNA cloning using in vitro site-  
663 specific recombination. *Genome Res.* **10**:1788–1795.
- 664 **Hauser, F., Waadt, R., and Schroeder, J. I.** (2011). Evolution of abscisic acid synthesis and  
665 signaling mechanisms. *Curr. Biol.* **21**:R346–R355.
- 666 **Huang, Y., Yario, T. A., and Steitz, J. A.** (2004). A molecular link between SR protein  
667 dephosphorylation and mRNA export. *Proc. Natl. Acad. Sci. U. S. A.* **101**:9666–70.
- 668 **Kim, D. Y., Scalf, M., Smith, L. M., and Vierstra, R. D.** (2013). Advanced proteomic  
669 analyses yield a deep catalog of ubiquitylation targets in Arabidopsis. *Plant Cell* **25**:1523–  
670 1540.
- 671 **Kiselev, K. V., Aleynova, O. A., Ogneva, Z. V., Suprun, A. R., and Dubrovina, A. S.**

- 672 (2021). 35S promoter-driven transgenes are variably expressed in different organs of  
673 *Arabidopsis thaliana* and in response to abiotic stress. *Mol. Biol. Rep.* **48**:2235–2241.
- 674 **Laloum, T., Carvalho, S. D., Martín, G., Richardson, D. N., Tiago, M., Cruz, D.,**  
675 **Carvalho, R. F., Stecca, K. L., Kinney, A. J., Barbosa, I. C. R., et al.** (2021). The plant-  
676 specific SCL30a SR protein regulates ABA-dependent seed traits and salt stress tolerance  
677 during germination Advance Access published 2021.
- 678 **Lee, J. H., Terzaghi, W., Gusmaroli, G., Charron, J. B. F., Yoon, H. J., Chen, H., He, Y.**  
679 **J., Xiong, Y., and Deng, X. W.** (2008). Characterization of *Arabidopsis* and rice DWD  
680 proteins and their roles as substrate receptors for CUL4-RING E3 ubiquitin ligases. *Plant*  
681 *Cell* **20**:152–167.
- 682 **Lee, J. H., Yoon, H. J., Terzaghi, W., Martinez, C., Dai, M., Li, J., Byun, M. O., and Deng,**  
683 **X. W.** (2010). DWA1 and DWA2, two *Arabidopsis* DWD protein components of CUL4-  
684 based E3 ligases, act together as negative regulators in ABA signal transduction. *Plant*  
685 *Cell* **22**:1716–1732.
- 686 **Li, Z., Waadt, R., and Schroeder, J. I.** (2016). Release of GTP Exchange Factor Mediated  
687 Down-Regulation of Abscisic Acid Signal Transduction through ABA-Induced Rapid  
688 Degradation of RopGEFs. *PLoS Biol.* **14**:1–27.
- 689 **Li, Z., Takahashi, Y., Scavo, A., Brandt, B., Nguyen, D., Rieu, P., and Schroeder, J. I.**  
690 (2018). Abscisic acid-induced degradation of *Arabidopsis* guanine nucleotide exchange  
691 factor requires calcium-dependent protein kinases. *Proc. Natl. Acad. Sci. U. S. A.*  
692 **115**:E4522–E4531.
- 693 **Liu, H., and Stone, S. L.** (2010). Abscisic acid increases *Arabidopsis* ABI5 transcription factor  
694 levels by promoting KEG E3 ligase self-ubiquitination and proteasomal degradation.  
695 *Plant Cell* **22**:2630–2641.
- 696 **Merlot, S., Gosti, F., Guerrier, D., Vavasseur, A., and Giraudat, J.** (2001). The ABI1 and  
697 ABI2 protein phosphatases 2C act in a negative feedback regulatory loop of the abscisic  
698 acid signalling pathway. *Plant J.* **25**:295–303.
- 699 **Mizoi, J., Kanazawa, N., Kidokoro, S., Takahashi, F., Qin, F., Morimoto, K., Shinozaki,**  
700 **K., and Yamaguchi-Shinozaki, K.** (2019). Heat-induced inhibition of phosphorylation  
701 of the stress-protective transcription factor DREB2A promotes thermotolerance of  
702 *Arabidopsis thaliana*. *J. Biol. Chem.* **294**:902–917.
- 703 **Mukhtar, M. S., Carvunis, A., Dreze, M., Epple, P., Steinbrenner, J., Moore, J., Tasan,**

- 704 **M., Galli, M., Hao, T., Nishimura, M. T., et al.** (2011). Plant Immune System Network.  
705 *Science* (80-. ). **333**:596–601.
- 706 **Nishimura, N., Yoshida, T., Kitahata, N., Asami, T., Shinozaki, K., and Hirayama, T.**  
707 (2007). ABA-Hypersensitive Germination1 encodes a protein phosphatase 2C, an  
708 essential component of abscisic acid signaling in Arabidopsis seed. *Plant J.* **50**:935–949.
- 709 **Palusa, S. G., Ali, G. S., and Reddy, A. S. N.** (2007). Alternative splicing of pre-mRNAs of  
710 Arabidopsis serine/arginine-rich proteins: Regulation by hormones and stresses. *Plant J.*  
711 **49**:1091–1107.
- 712 **Rizza, A., Walia, A., Tang, B., and Jones, A. M.** (2019). Visualizing cellular gibberellin  
713 levels using the nlsGPS1 Förster resonance energy transfer (FRET) biosensor. *J. Vis. Exp.*  
714 **2019**:58739.
- 715 **Rueden, C. T., Schindelin, J., Hiner, M. C., DeZonia, B. E., Walter, A. E., Arena, E. T.,  
716 and Eliceiri, K. W.** (2017). ImageJ2: ImageJ for the next generation of scientific image  
717 data. *BMC Bioinformatics* **18**:529.
- 718 **Sadanandom, A., Bailey, M., Ewan, R., Lee, J., and Nelis, S.** (2012). The ubiquitin-  
719 proteasome system: Central modifier of plant signalling. *New Phytol.* **196**:13–28.
- 720 **Sah, S. K., Reddy, K. R., and Li, J.** (2016). Abscisic Acid and Abiotic Stress Tolerance in  
721 Crop Plants. *Front. Plant Sci.* **7**:571.
- 722 **Sanford, J. R., Ellis, J. D., Cazalla, D., and Cáceres, J. F.** (2005). Reversible  
723 phosphorylation differentially affects nuclear and cytoplasmic functions of splicing factor  
724 2/alternative splicing factor. *Proc. Natl. Acad. Sci. U. S. A.* **102**:15042–7.
- 725 **Schneider, C. A., Rasband, W. S., and Eliceiri, K. W.** (2012). NIH Image to ImageJ: 25  
726 years of image analysis. *Nat. Methods* **9**:671–675.
- 727 **Shen, Y., Khanna, R., Carle, C. M., and Quail, P. H.** (2007). Phytochrome induces rapid  
728 PIF5 phosphorylation and degradation in response to red-light activation. *Plant Physiol.*  
729 **145**:1043–1051.
- 730 **Shi, Y., and Manley, J. L.** (2007). A Complex Signaling Pathway Regulates SRp38  
731 Phosphorylation and Pre-mRNA Splicing in Response to Heat Shock. *Mol. Cell* **28**:79–  
732 90.
- 733 **Sugliani, M., Brambilla, V., Clercx, E. J. M., Koornneef, M., and Soppe, W. J. J.** (2010).  
734 The conserved splicing factor SUA controls alternative splicing of the developmental  
735 regulator ABI3 in Arabidopsis. *Plant Cell* **22**:1936–1946.



- 736 **Tanabe, N., Kimura, A., Yoshimura, K., and Shigeoka, S.** (2009). Plant-specific SR-related  
737 protein atSR45a interacts with spliceosomal proteins in plant nucleus. *Plant Mol. Biol.*  
738 **70**:241–252.
- 739 **Umezawa, T., Sugiyama, N., Takahashi, F., Anderson, J. C., Ishihama, Y., Peck, S. C.,  
740 and Shinozaki, K.** (2013). Genetics and Phosphoproteomics Reveal a Protein  
741 Phosphorylation Network in the Abscisic Acid Signaling Pathway in Arabidopsis  
742 thaliana. *Sci. Signal.* **6**:rs8–rs8.
- 743 **Vandesompele, J., De Preter, K., Pattyn, F., Poppe, B., Van Roy, N., De Paepe, A., and  
744 Speleman, F.** (2002). Accurate normalization of real-time quantitative RT-PCR data by  
745 geometric averaging of multiple internal control genes. *Genome Biol.* **3**:research0034-1.
- 746 **Vu, L. D., Gevaert, K., and De Smet, I.** (2018). Protein Language: Post-Translational  
747 Modifications Talking to Each Other. *Trends Plant Sci.* **23**:1068–1080.
- 748 **Wang, X., Wu, F., Xie, Q., Wang, H., Wang, Y., Yue, Y., Gahura, O., Ma, S., Liu, L., Cao,  
749 Y., et al.** (2012). SKIP is a component of the spliceosome linking alternative splicing and  
750 the circadian clock in Arabidopsis. *Plant Cell* **24**:3278–3295.
- 751 **Wang, P., Xue, L., Batelli, G., Lee, S., Hou, Y.-J., Van Oosten, M. J., Zhang, H., Tao, W.  
752 A., and Zhu, J.-K.** (2013). Quantitative phosphoproteomics identifies SnRK2 protein  
753 kinase substrates and reveals the effectors of abscisic acid action. *Proc. Natl. Acad. Sci.*  
754 **110**:11205–11210.
- 755 **Xing, D., Wang, Y., Hamilton, M., Ben-Hur, A., and Reddy, A. S. N.** (2015).  
756 Transcriptome-wide identification of RNA targets of arabidopsis SERINE/ARGININE-  
757 RICH45 uncovers the unexpected roles of this RNA binding protein in RNA  
758 processingopen. *Plant Cell* **27**:3294–3308.
- 759 **Yang, W., Zhang, W., and Wang, X.** (2017). Post-translational control of ABA signalling:  
760 the roles of protein phosphorylation and ubiquitination. *Plant Biotechnol. J.* **15**:4–14.
- 761 **Yoshida, T., Nishimura, N., Kitahata, N., Kuromori, T., Ito, T., Asami, T., Shinozaki, K.,  
762 and Hirayama, T.** (2006). ABA-hypersensitive germination3 encodes a protein  
763 phosphatase 2C (AtPP2CA) that strongly regulates abscisic acid signaling during  
764 germination among Arabidopsis protein phosphatase 2Cs. *Plant Physiol.* **140**:115–126.
- 765 **Yue, J., Qin, Q., Meng, S., Jing, H., Gou, X., Li, J., and Hou, S.** (2016). TOPP4 regulates  
766 the stability of PHYTOCHROME INTERACTING FACTOR5 during  
767 photomorphogenesis in Arabidopsis. *Plant Physiol.* **170**:1381–1397.

768 **Zhang, X. N., and Mount, S. M.** (2009). Two alternatively spliced isoforms of the Arabidopsis  
769 SR45 protein have distinct roles during normal plant development. *Plant Physiol.*  
770 **150**:1450–1458.

771 **Zhang, Y., Feng, S., Chen, F., Chen, H., Wang, J., McCall, C., Xiong, Y., and Xing, W. D.**  
772 (2008). Arabidopsis DDB1-CUL4 associated factor1 forms a nuclear E3 ubiquitin ligase  
773 with DDB1 and CUL4 that is involved in multiple plant developmental processes. *Plant*  
774 *Cell* **20**:1437–1455.

775 **Zhang, X. N., Mo, C., Garrett, W. M., and Cooper, B.** (2014). Phosphothreonine 218 is  
776 required for the function of SR45.1 in regulating flower petal development in arabidopsis.  
777 *Plant Signal. Behav.* **9**.

## 778 **FIGURE LEGENDS**

### 779 **Figure 1. Effect of SR45 overexpression on ABA signaling during cotyledon development.**

780 **(A)** RT-qPCR analysis of *SR45-GFP* transcript levels in 7-day-old pUBQ10::*SR45-GFP/sr45-*  
781 *1* (OX1 and OX2) and pSR45::*SR45-GFP/sr45-1* (C1 and C2) transgenic seedlings grown  
782 under control conditions, using *PEX4* as a reference gene and primers annealing to either the  
783 *SR45* or *GFP* sequences (see Supplemental Figure 1). Transcript levels of either the Col-0  
784 (*SR45* primers) or the C2 transgenic line (*GFP* primers) were set to 1. Results represent means  
785  $\pm$  SE ( $n = 3$ ), and different letters indicate statistically significant differences between  
786 genotypes for each set of primers ( $P < 0.05$ ; Student's *t*-test).

787 **(B)** Protein gel blot analysis using  $\alpha$ -GFP antibodies of the SR45-GFP fusion protein in 7-day-  
788 old seedlings of overexpression (OX1 and OX2) and complementation (C1 and C2) transgenic  
789 lines grown under control conditions. A total of 30 ng of protein was loaded per sample, and  
790 Ponceau staining is shown as a loading control. Results are representative of at least 3  
791 independent experiments.

792 **(C)** Representative images and quantification of cotyledon greening in 7-day-old seedlings of  
793 the Col-0 wild type, the *sr45-1* mutant, the OX1 and OX2 overexpression lines and the C1 and  
794 C2 complementation lines grown under control conditions or in the presence of 0.5  $\mu$ M ABA  
795 (means  $\pm$  SE,  $n = 3$ ). Different letters indicate statistically significant differences between  
796 genotypes under each condition ( $P < 0.05$ ; Student's *t*-test). Scale bar = 2.5 mm.

### 797 **Figure 2. Effect of ABA on SR45 protein levels.**

798 (A) Protein gel blot analysis using  $\alpha$ -GFP antibodies of the SR45-GFP fusion protein in 7-day-  
799 old seedlings of the C2 complementation transgenic line treated for 0, 30, 60, 90 or 180 minutes  
800 with 2  $\mu$ M ABA. Control samples were treated with the equivalent volume of the solvent of  
801 the ABA solution (ethanol). A total of 40 ng of protein was loaded per sample, and Ponceau  
802 staining is shown as a loading control. Results are representative of at least 3 independent  
803 experiments.

804 (B) Sum Z projection images (top) and fluorescence intensity quantification (bottom) of fast  
805 SR45-GFP accumulation in the primary root of 4-day-old seedlings of the C2 complementation  
806 transgenic line treated with 10  $\mu$ M ABA observed by confocal microscopy. Scale bar = 100  
807  $\mu$ m. Line indicates mean values, with shaded region indicating the 95% confidence interval.

808 **Figure 3. Effect of ABA and loss of SnRK2 function on SR45 protein phosphorylation**  
809 **and amounts.**

810 Phos-tag (A) and protein (B) gel blot analyses using  $\alpha$ -GFP antibodies of the SR45-GFP fusion  
811 protein in 7-day-old seedlings of the C2 complementation (SR45-GFP/*sr45-1*) line and a  
812 transgenic line expressing the pSR45::gSR45-GFP construct in the *snrk2.2/3/6* mutant  
813 background (SR45-GFP/*snrk2.2/3/6*) treated for 180 minutes with 2  $\mu$ M ABA. Control samples  
814 were treated with the equivalent volume of the solvent of the ABA solution (ethanol), and a  
815 total of 40 ng of protein were loaded per sample. In (A), arrows indicate phosphorylated forms  
816 of SR45, and the results are representative of at least 3 independent experiments. In (B), bands  
817 were quantified and relative protein levels determined using the Ponceau loading control as a  
818 reference, with results representing means  $\pm$  SE ( $n = 4$ ), control conditions set to 1, and different  
819 letters indicating statistically significant differences between treatments for each genotype ( $P$   
820  $< 0.05$ ; Student's *t*-test).

821 **Figure 4. Effect of ABA on SR45 protein stability and ubiquitination.**

822 (A) Protein gel blot analysis using  $\alpha$ -GFP antibodies of the SR45-GFP fusion protein in 7-day-  
823 old seedlings of the C2 complementation line pre-treated with MG132 and subjected to a 180-  
824 minute treatment with 2  $\mu$ M ABA. Control samples (-MG132 or -ABA) were treated with the  
825 equivalent volume of the solvent of the MG132 or ABA solutions (DMSO or ethanol,  
826 respectively). A total of 40 ng of protein were loaded per sample. Bands were quantified and  
827 relative protein levels determined using the Ponceau loading control as a reference, with control  
828 conditions set to 1. Results represent means  $\pm$  SE ( $n = 4$ ), and different letters indicate  
829 statistically significant differences between treatments ( $P < 0.05$ ; Student's *t*-test).

830 **(B)** Protein gel blot analysis of the SR45-GFP fusion protein immunoprecipitated from extracts  
831 of 7-day-old seedlings of the C2 complementation line treated for 180 minutes with 2  $\mu$ M ABA  
832 using  $\alpha$ -GFP (IP) or  $\alpha$ -UBQ11 (Co-IP) antibodies. Control samples were treated with the  
833 equivalent volume of the solvent of the ABA solution (ethanol). Equal volumes of both the  
834 input fraction (Input) and the IP were loaded. Signals were quantified and the UBQ/SR45-GFP  
835 ratio determined, with control conditions set to 1. Results represent means  $\pm$  SE ( $n = 3$ ), and  
836 different letters indicate statistically significant differences between treatments ( $P < 0.05$ ;  
837 Student's *t*-test).

838 **Figure 5. Effect of T264 phosphorylation on SR45 ubiquitination and degradation.**

839 **(A)** Protein gel blot analysis of the SR45-GFP fusion protein immunoprecipitated from  
840 extracts of 7-day-old seedlings of the OX1 overexpression (pUBQ10::SR45-GFP/*sr45-1*),  
841 PMut1 phosphomutant (pUBQ10::SR45-GFP\_T264A/*sr45-1*) and PMim1 phosphomimetic  
842 (pUBQ10::SR45-GFP\_T264D/*sr45-1*) transgenic lines grown in control conditions using  $\alpha$ -  
843 GFP (IP) or  $\alpha$ -UBQ11 (Co-IP) antibodies. Equal volumes of both the input fraction (Input) and  
844 the IP were loaded. Signals were quantified and the UBQ/SR45-GFP ratio determined, with  
845 control conditions set to 1. Results represent means  $\pm$  SE ( $n = 3$ ), and different letters indicate  
846 statistically significant differences between genotypes ( $P < 0.05$ ; Student's *t*-test).

847 **(B)** Protein gel blot analysis using  $\alpha$ -GFP antibodies of the SR45-GFP fusion protein in 7-day-  
848 old seedlings of the OX1 overexpression, PMut1 phosphomutant and PMim1 phosphomimetic  
849 transgenic lines supplemented or not with MG132 and left at room temperature for 0, 15, 30 or  
850 60 minutes. Control samples (-MG132) were treated with the equivalent volume of the solvent  
851 of the MG132 solution (DMSO), and a total of 20 ng of protein were loaded per sample. Bands  
852 were quantified and relative protein levels determined using the Ponceau loading control as a  
853 reference, with time 0 set to 1. Results are representative of at least 3 independent experiments.

854 **Figure 6. Effect of T264 phosphorylation on ABA-dependent SR45 protein accumulation**  
855 **and cotyledon development.**

856 **(A)** Protein gel blot analysis using  $\alpha$ -GFP antibodies of the SR45-GFP fusion protein in 7-day-  
857 old seedlings of the OX1 overexpression (pUBQ10::SR45-GFP/*sr45-1*), PMut1  
858 phosphomutant (pUBQ10::SR45-GFP\_T264A/*sr45-1*) and PMim1 phosphomimetic  
859 (pUBQ10::SR45-GFP\_T264D/*sr45-1*) transgenic lines treated for 180 minutes with 2  $\mu$ M  
860 ABA. Control samples were treated with the equivalent volume of the solvent of the ABA

861 solution (ethanol), and a total of 20 ng of protein were loaded per sample. Bands were  
862 quantified and relative protein levels determined using the Ponceau loading control as a  
863 reference, with results representing means  $\pm$  SE ( $n = 3$ ), control conditions set to 1, and different  
864 letters indicating statistically significant differences between treatments for each genotype ( $P$   
865  $< 0.05$ ; Student's  $t$ -test).

866 **(B)** Cotyledon greening percentages of 7-day-old seedlings of the OX1 overexpression, PMut1  
867 phosphomutant and PMim1 phosphomimetic transgenic lines grown under control conditions  
868 or in the presence of 0.5  $\mu$ M ABA, with representative images of ABA conditions (scale bar =  
869 1 cm), and RT-qPCR analysis of *SR45-GFP* transcript levels in the same seedlings (control  
870 conditions), using *PEX4* as a reference gene and primers annealing to the *GFP* sequence (see  
871 Supplemental Figure 1). Results represent means  $\pm$  SE ( $n = 3$ ), and different letters indicate  
872 statistically significant differences between genotypes ( $P > 0.05$ ; Student's  $t$ -test).

873 **Figure 7. Model of ABA-mediated SR45 regulation of early seedling development.**

874 In the absence of ABA, PP2Cs inhibit SnRK2 activity, thus blocking ABA signaling and its  
875 inhibition of early seedling development. Under these conditions, SR45 is phosphorylated by  
876 (an) unknown kinase(s), triggering SR45 ubiquitination and proteasomal degradation.

877 When ABA accumulates in the cell, the hormone binds to the PYL/PYR/RCAR receptors  
878 creating a complex with PP2C, thus derepressing SnRK2s that are then able to activate  
879 themselves through autophosphorylation and induce downstream signaling. ABA signaling  
880 either activates (a) phosphatase(s) or inactivates (a) kinase(s) that dephosphorylate SR45,  
881 leading to its deubiquitination and stabilization. The increase in SR45 protein levels then results  
882 in negative regulation of ABA signaling, alleviating its inhibition of early seedling  
883 development.

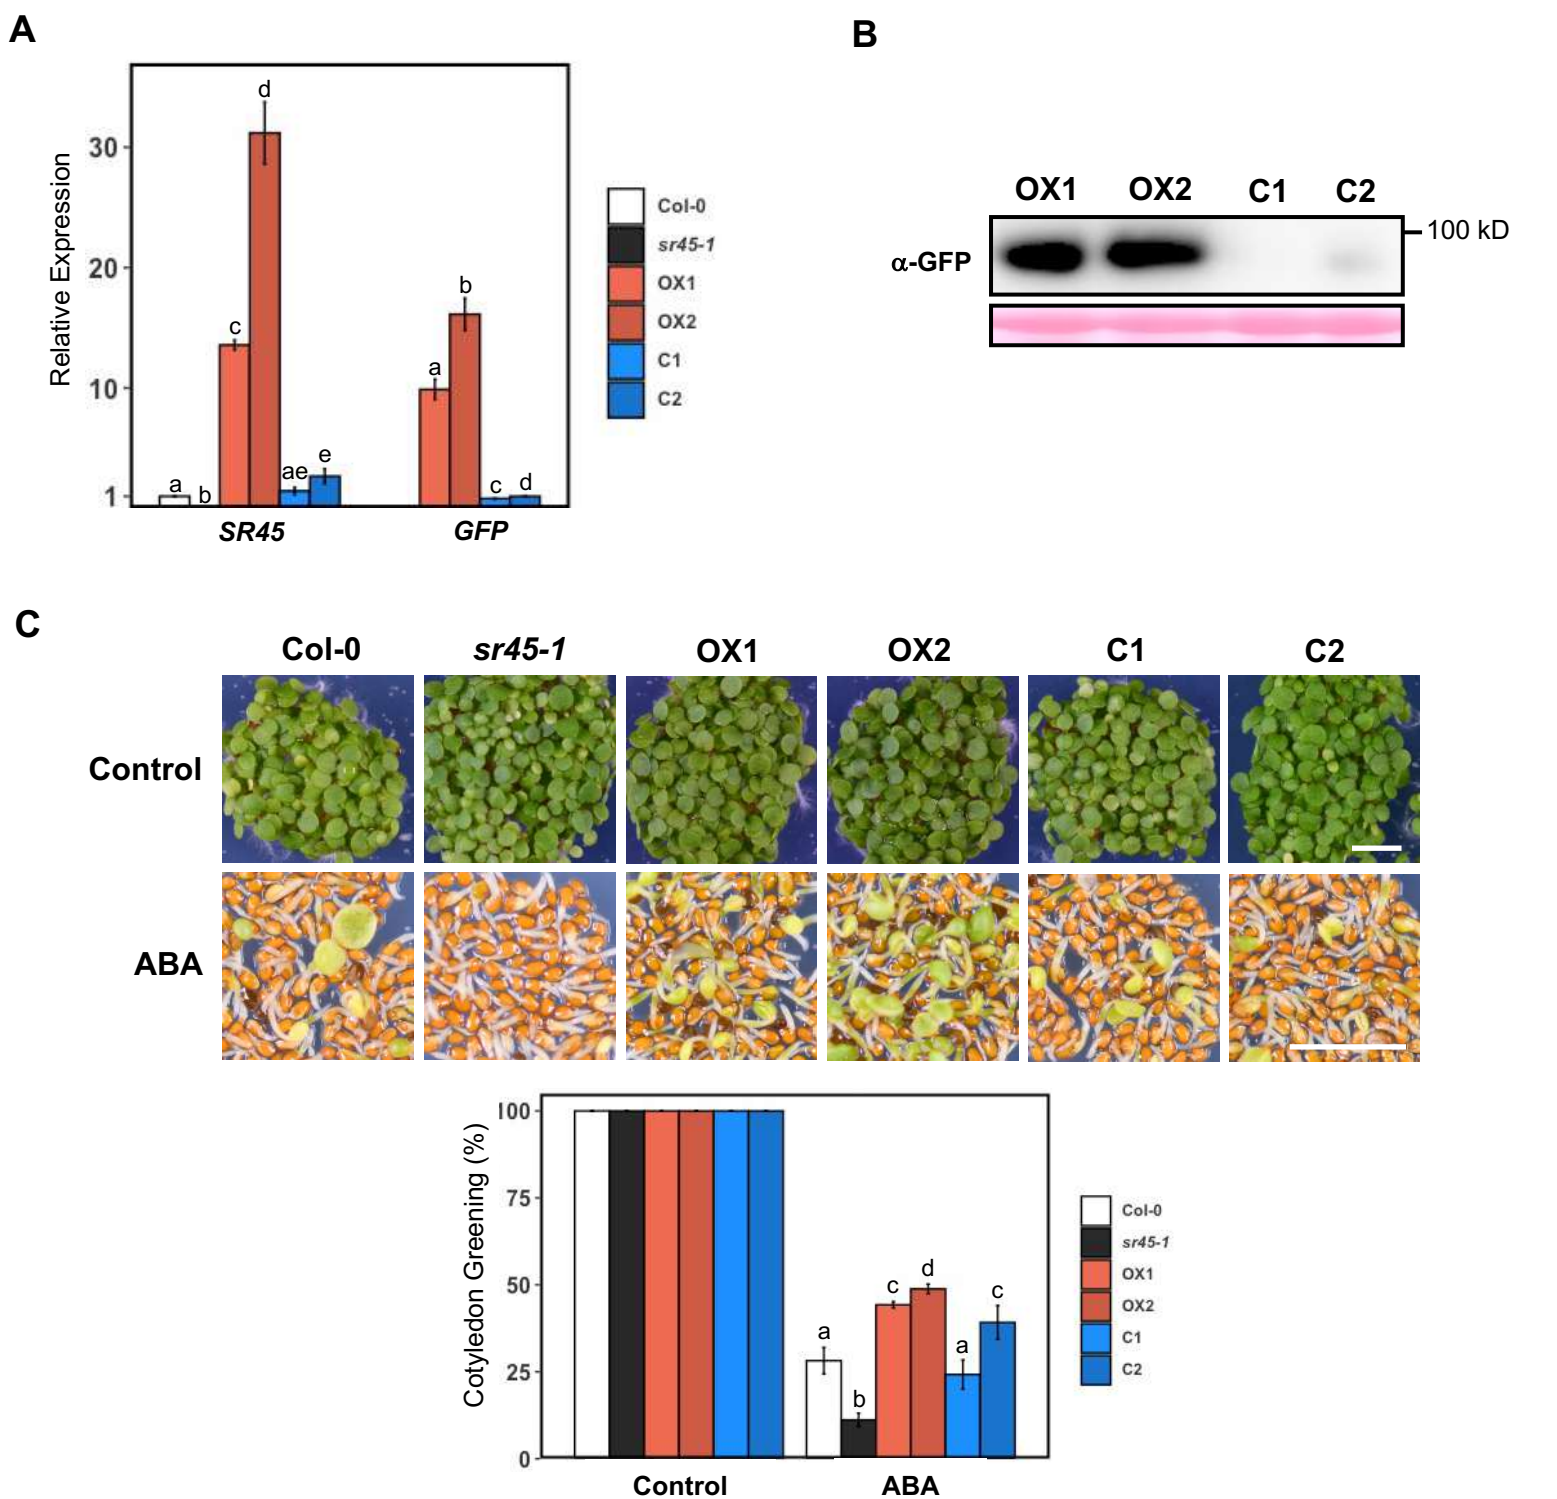

**Figure 1. Effect of *SR45* overexpression on ABA signaling during cotyledon development.**

**(A)** RT-qPCR analysis of *SR45-GFP* transcript levels in 7-day-old pUBQ10::*SR45-GFP/sr45-1* (OX1 and OX2) and p*SR45*::*SR45-GFP/sr45-1* (C1 and C2) transgenic seedlings grown under control conditions, using *PEX4* as a reference gene and primers annealing to either the *SR45* or *GFP* sequences (see supplemental Figure 1). Transcript levels of either the Col-0 (*SR45* primers) or the C2 transgenic line (*GFP* primers) were set to 1. Results represent means  $\pm$  SE ( $n = 3$ ), and different letters indicate statistically significant differences between genotypes for each set of primers ( $P < 0.05$ ; Student's *t*-test).

**(B)** Protein gel blot analysis using  $\alpha$ -GFP antibodies of the *SR45-GFP* fusion protein in 7-day-old seedlings of overexpression (OX1 and OX2) and complementation (C1 and C2) transgenic lines grown under control conditions. A total of 30 ng of protein was loaded per sample, and Ponceau staining is shown as a loading control. Results are representative of at least 3 independent experiments.

**(C)** Representative images and quantification of cotyledon greening in 7-day-old seedlings of the Col-0 wild type, the *sr45-1* mutant, the OX1 and OX2 overexpression lines and the C1 and C2 complementation lines grown under control conditions or in the presence of 0.5  $\mu$ M ABA (means  $\pm$  SE,  $n = 3$ ). Different letters indicate statistically significant differences between genotypes under each condition ( $P < 0.05$ ; Student's *t*-test). Scale bar = 2.5 mm.

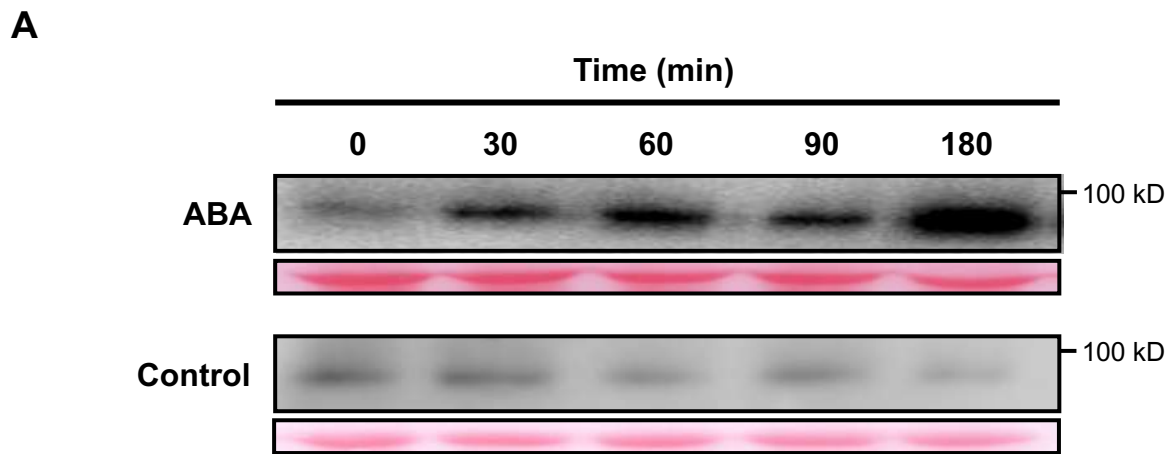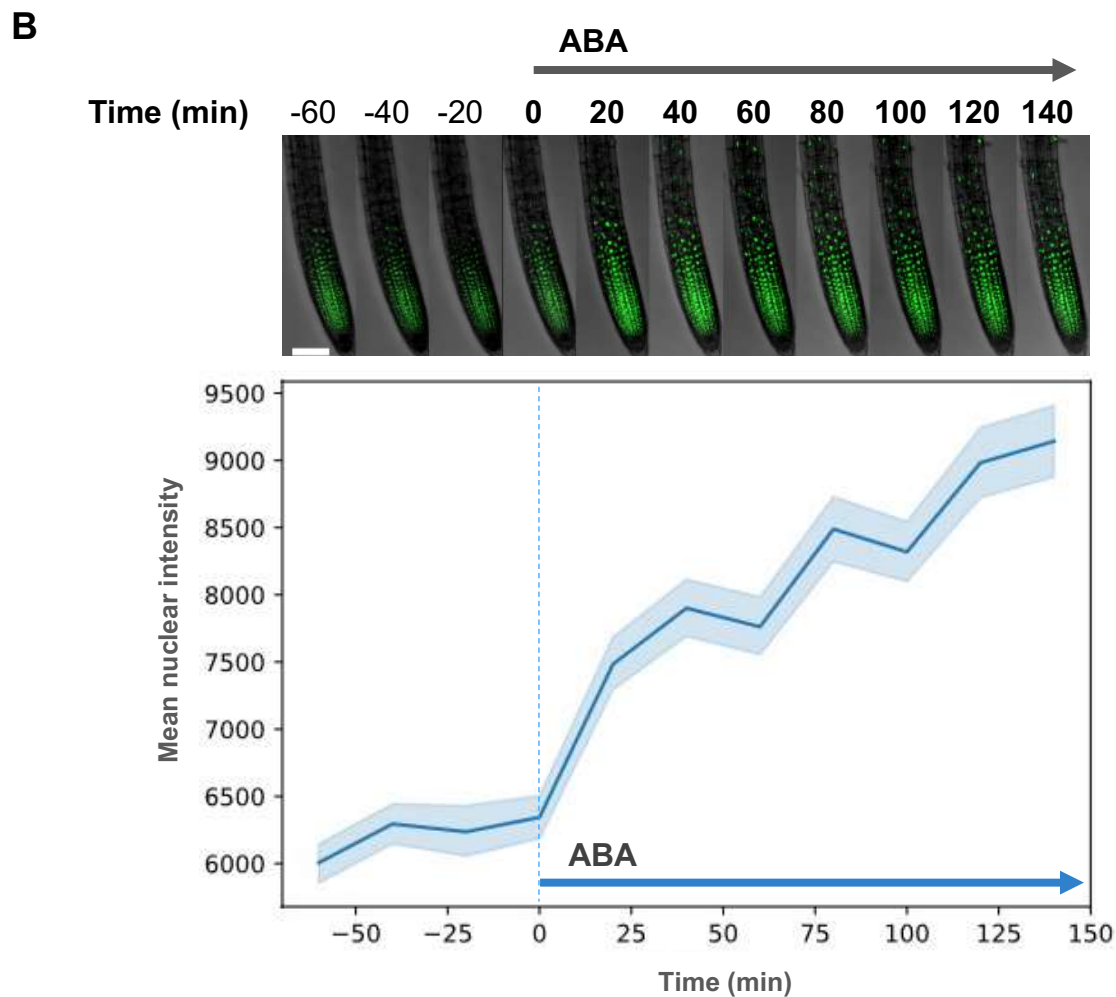

**Figure 2. Effect of ABA on SR45 protein levels.**

**(A)** Protein gel blot analysis using  $\alpha$ -GFP antibodies of the SR45-GFP fusion protein in 7-day-old seedlings of the C2 complementation transgenic line treated for 0, 30, 60, 90 or 180 minutes with 2  $\mu$ M ABA. Control samples were treated with the equivalent volume of the solvent of the ABA solution (ethanol). A total of 40 ng of protein was loaded per sample, and Ponceau staining is shown as a loading control. Results are representative of at least 3 independent experiments.

**(B)** Sum Z projection images (top) and fluorescence intensity quantification (bottom) of fast SR45-GFP accumulation in the primary root of 4-day-old seedlings of the C2 complementation transgenic line treated with 10  $\mu$ M ABA observed by confocal microscopy. Scale bar = 100  $\mu$ m. Line indicates mean values, with shaded region indicating the 95% confidence interval.

**A**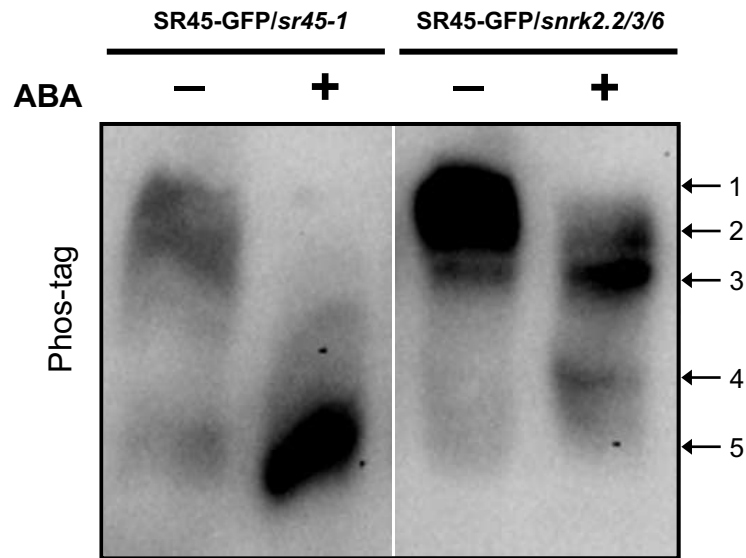**B**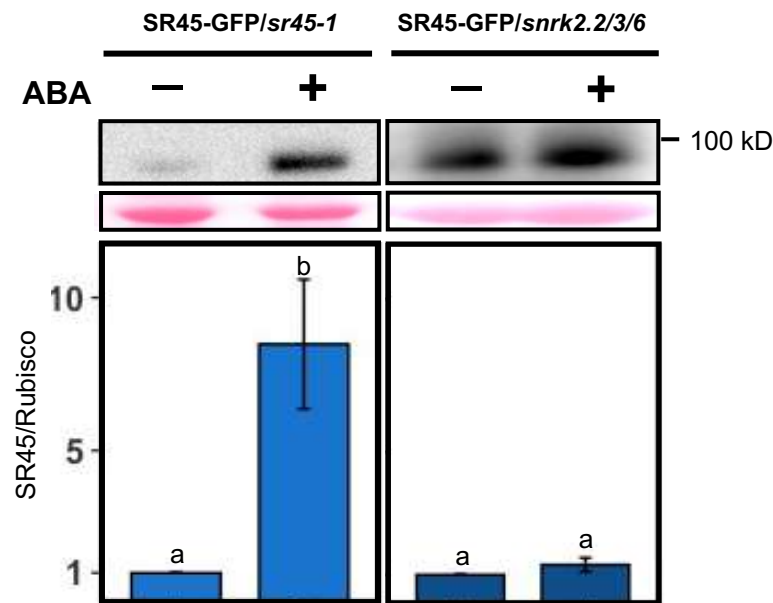

**Figure 3. Effect of ABA and loss of SnRK2 function on SR45 protein phosphorylation and amounts.**

Phos-tag (**A**) and protein (**B**) gel blot analyses using  $\alpha$ -GFP antibodies of the SR45-GFP fusion protein in 7-day-old seedlings of the C2 complementation (SR45-GFP/*sr45-1*) line and a transgenic line expressing the pSR45::gSR45-GFP construct in the *snrk2.2/3/6* mutant background (SR45-GFP/*snrk2.2/3/6*) treated for 180 minutes with 2  $\mu$ M ABA. Control samples were treated with the equivalent volume of the solvent of the ABA solution (ethanol), and a total of 40 ng of protein were loaded per sample. In (**A**), arrows indicate phosphorylated forms of SR45, and the results are representative of at least 3 independent experiments. In (**B**), bands were quantified and relative protein levels determined using the Ponceau loading control as a reference, with results representing means  $\pm$  SE ( $n = 4$ ), control conditions set to 1, and different letters indicating statistically significant differences between treatments for each genotype ( $P < 0.05$ ; Student's  $t$ -test).



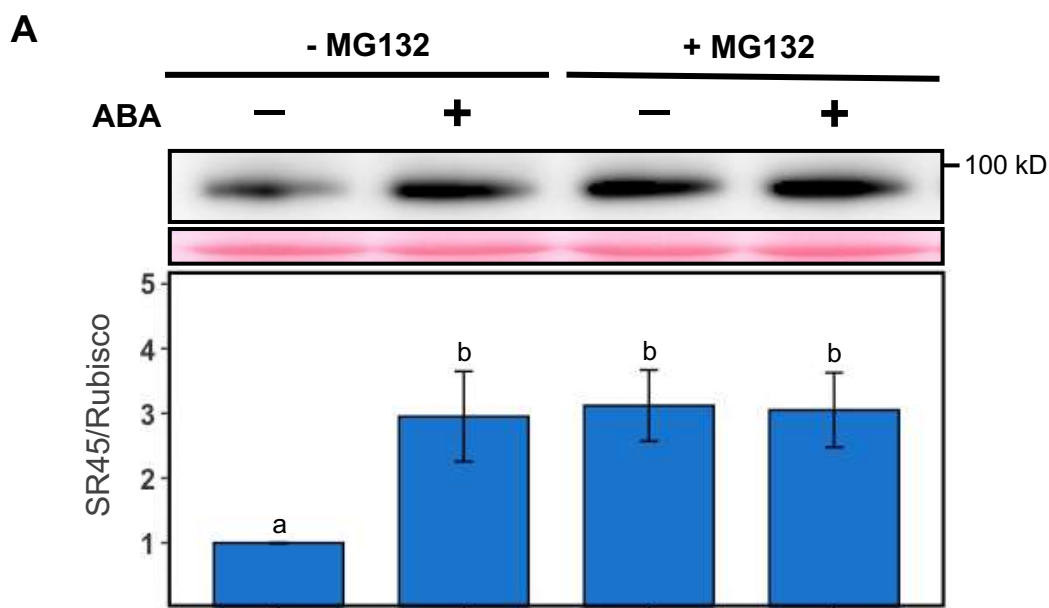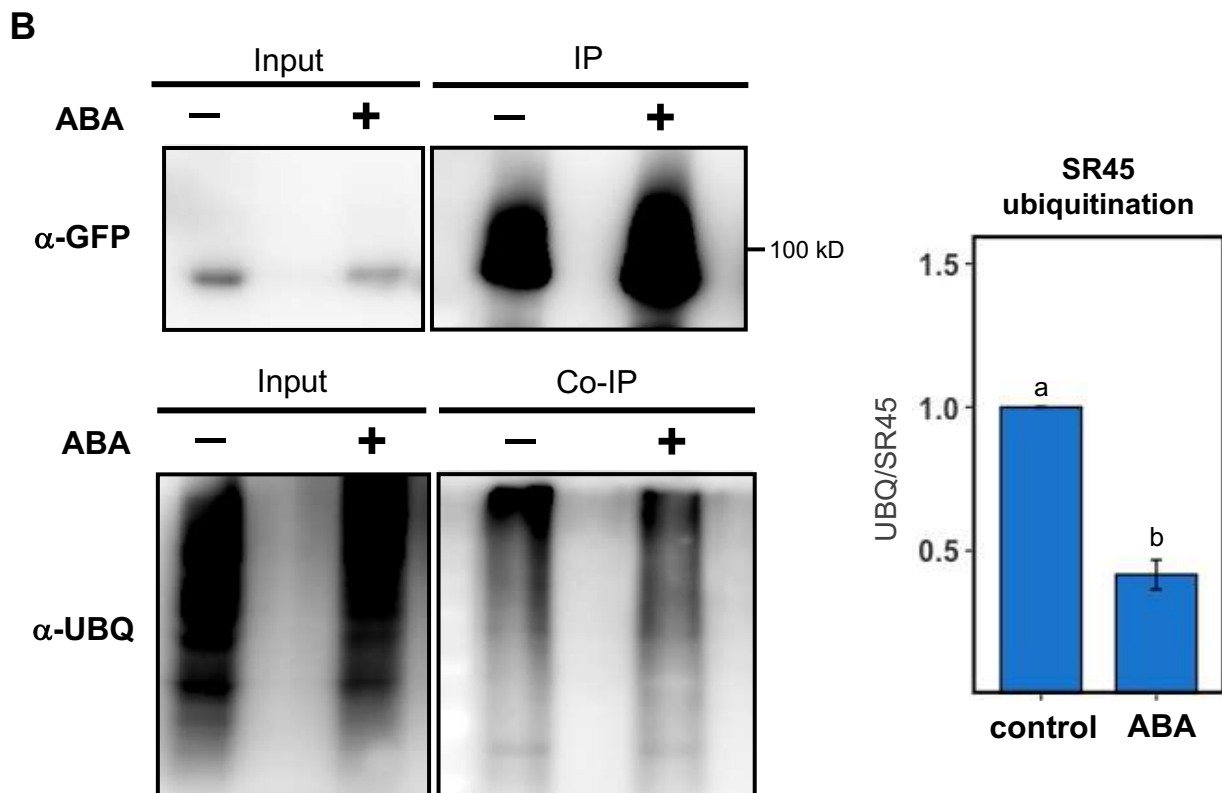

**Figure 4. Effect of ABA on SR45 protein stability and ubiquitination.**

**(A)** Protein gel blot analysis using  $\alpha$ -GFP antibodies of the SR45-GFP fusion protein in 7-day-old seedlings of the C2 complementation line pre-treated with MG132 and subjected to a 180-minute treatment with 2  $\mu$ M ABA. Control samples (-MG132 or -ABA) were treated with the equivalent volume of the solvent of the MG132 or ABA solutions (DMSO or ethanol, respectively). A total of 40 ng of protein were loaded per sample. Bands were quantified and relative protein levels determined using the Ponceau loading control as a reference, with control conditions set to 1. Results represent means  $\pm$  SE ( $n = 4$ ), and different letters indicate statistically significant differences between treatments ( $P < 0.05$ ; Student's *t*-test).

**(B)** Protein gel blot analysis of the SR45-GFP fusion protein immunoprecipitated from extracts of 7-day-old seedlings of the C2 complementation line treated for 180 minutes with 2  $\mu$ M ABA using  $\alpha$ -GFP (IP) or  $\alpha$ -UBQ11 (Co-IP) antibodies. Control samples were treated with the equivalent volume of the solvent of the ABA solution (ethanol). Equal volumes of both the input fraction (Input) and the IP were loaded. Signals were quantified and the UBQ/SR45-GFP ratio determined, with control conditions set to 1. Results represent means  $\pm$  SE ( $n = 3$ ), and different letters indicate statistically significant differences between treatments ( $P < 0.05$ ; Student's *t*-test).

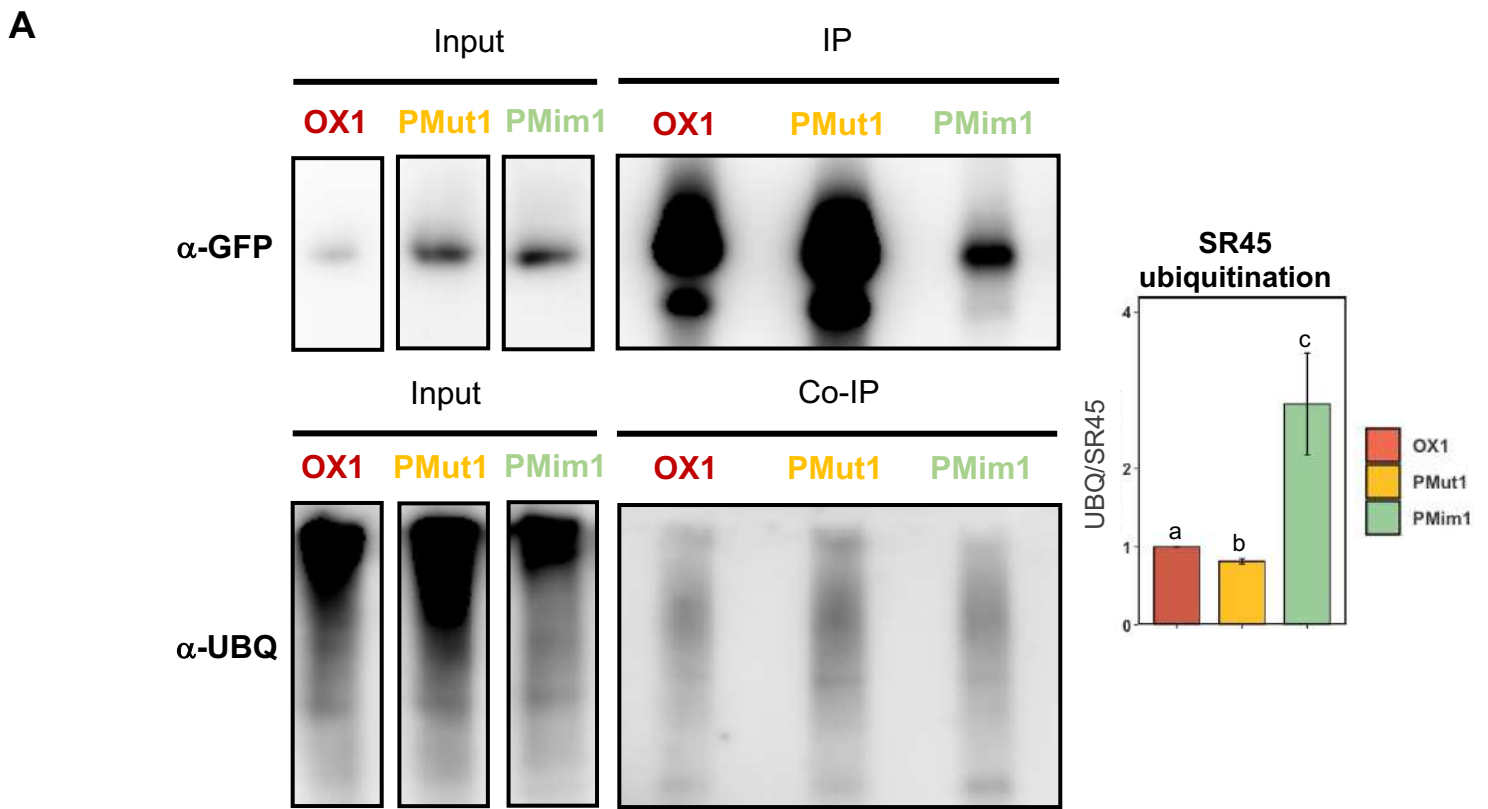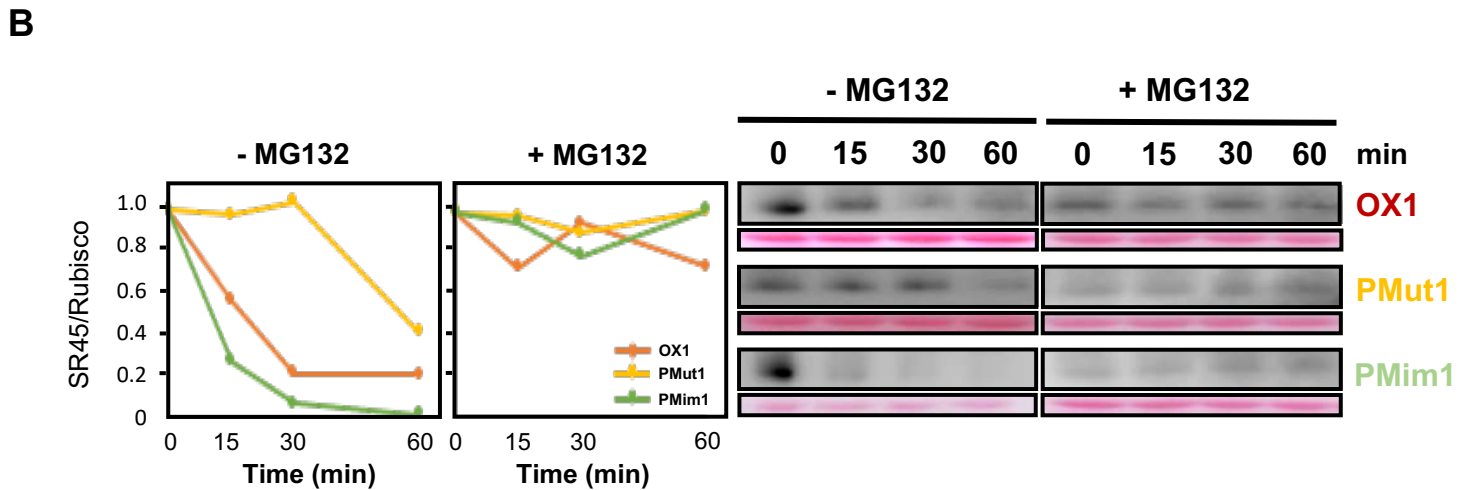

**Figure 5. Effect of T264 phosphorylation on SR45 ubiquitination and degradation.**

(A) Protein gel blot analysis of the SR45-GFP fusion protein immunoprecipitated from extracts of 7-day-old seedlings of the OX1 overexpression (pUBQ10::SR45-GFP/*sr45-1*), PMut1 phosphomutant (pUBQ10::SR45-GFP\_T264A/*sr45-1*) and PMim1 phosphomimetic (pUBQ10::SR45-GFP\_T264D/*sr45-1*) transgenic lines grown in control conditions using  $\alpha$ -GFP (IP) or  $\alpha$ -UBQ11 (Co-IP) antibodies. Equal volumes of both the input fraction (Input) and the IP were loaded. Signals were quantified and the UBQ/SR45-GFP ratio determined, with control conditions set to 1. Results represent means  $\pm$  SE ( $n = 3$ ), and different letters indicate statistically significant differences between genotypes ( $P < 0.05$ ; Student's *t*-test).

(B) Protein gel blot analysis using  $\alpha$ -GFP antibodies of the SR45-GFP fusion protein in 7-day-old seedlings of the OX1 overexpression, PMut1 phosphomutant and PMim1 phosphomimetic transgenic lines supplemented or not with MG132 and left at room temperature for 0, 15, 30 or 60 minutes. Control samples (-MG132) were treated with the equivalent volume of the solvent of the MG132 solution (DMSO), and a total of 20 ng of protein were loaded per sample. Bands were quantified and relative protein levels determined using the Ponceau loading control as a reference, with time 0 set to 1. Results are representative of at least 3 independent experiments.

**A**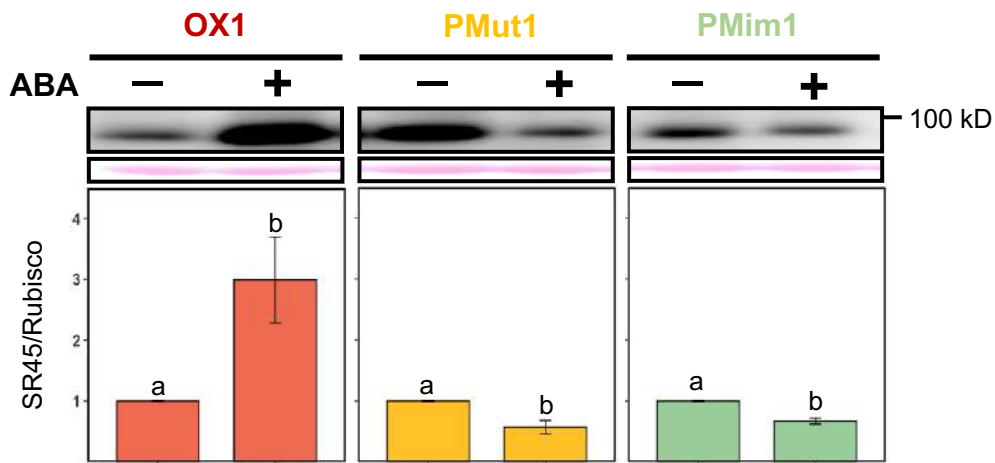**B**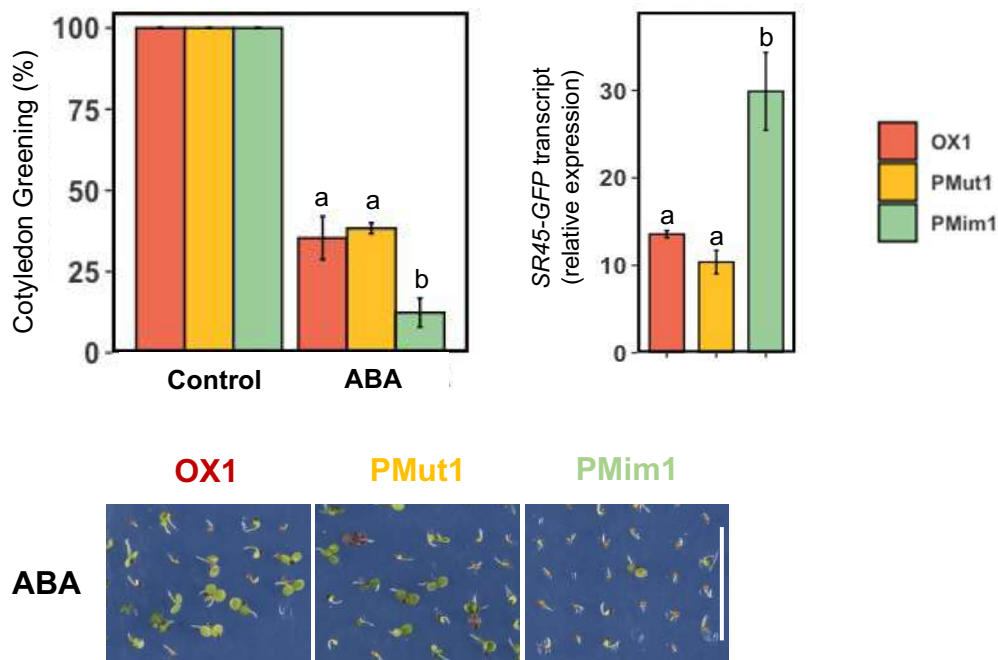

**Figure 6. Effect of T264 phosphorylation on ABA-dependent SR45 protein accumulation and cotyledon development.**

**(A)** Protein gel blot analysis using  $\alpha$ -GFP antibodies of the SR45-GFP fusion protein in 7-day-old seedlings of the OX1 overexpression (pUBQ10::SR45-GFP/*sr45-1*), PMut1 phosphomutant (pUBQ10::SR45-GFP\_T264A/*sr45-1*) and PMim1 phosphomimetic (pUBQ10::SR45-GFP\_T264D/*sr45-1*) transgenic lines treated for 180 minutes with 2  $\mu$ M ABA. Control samples were treated with the equivalent volume of the solvent of the ABA solution (ethanol), and a total of 20 ng of protein were loaded per sample. Bands were quantified and relative protein levels determined using the Ponceau loading control as a reference, with results representing means  $\pm$  SE ( $n = 3$ ), control conditions set to 1, and different letters indicating statistically significant differences between treatments for each genotype ( $P < 0.05$ ; Student's *t*-test).

**(B)** Cotyledon greening percentages of 7-day-old seedlings of the OX1 overexpression, PMut1 phosphomutant and PMim1 phosphomimetic transgenic lines grown under control conditions or in the presence of 0.5  $\mu$ M ABA, with representative images of ABA conditions (scale bar = 1 cm), and RT-qPCR analysis of *SR45-GFP* transcript levels in the same seedlings (control conditions), using *PEX4* as a reference gene and primers annealing to the *GFP* sequence (see Supplemental Figure 1). Results represent means  $\pm$  SE ( $n = 3$ ), and different letters indicate statistically significant differences between genotypes ( $P > 0.05$ ; Student's *t*-test).

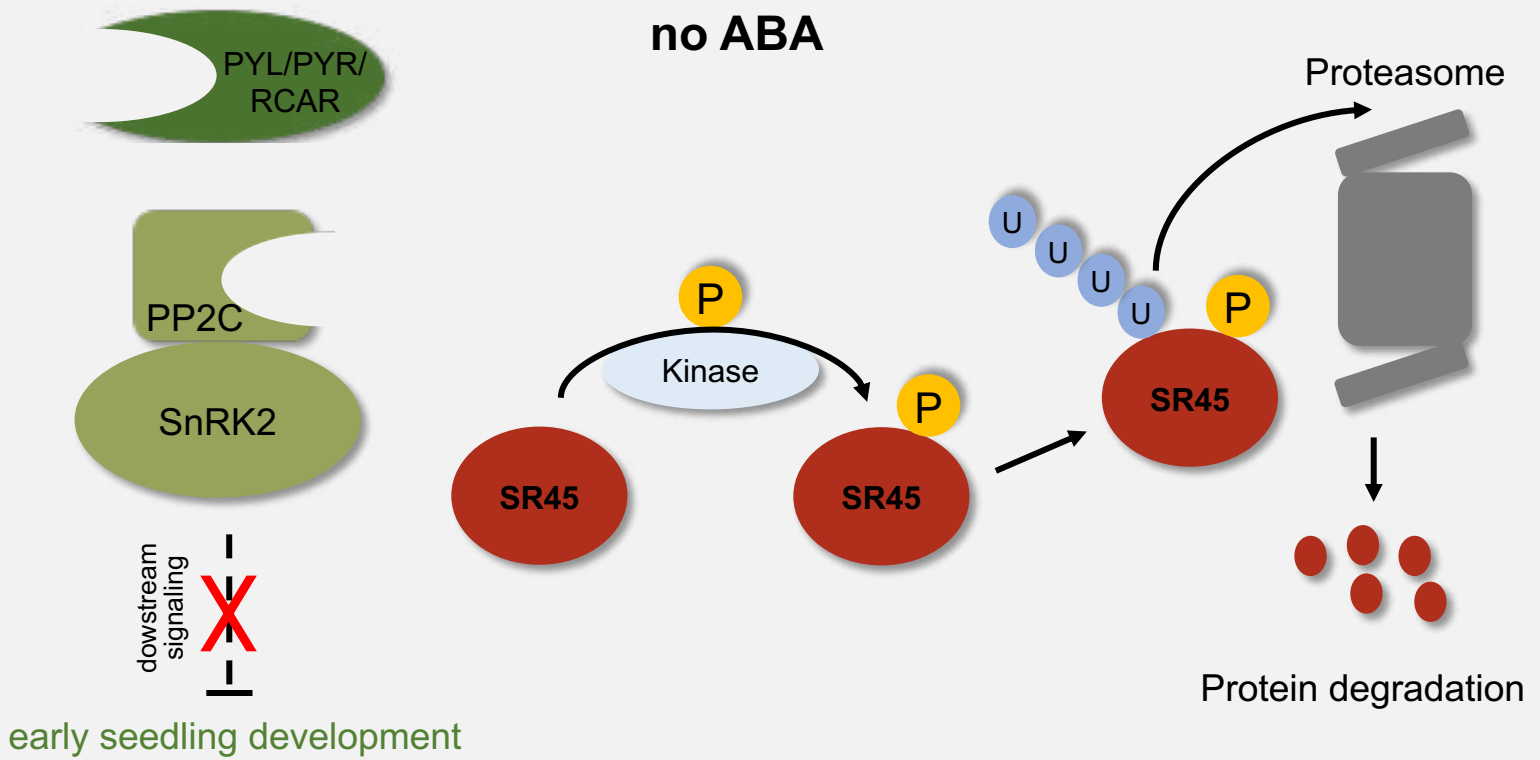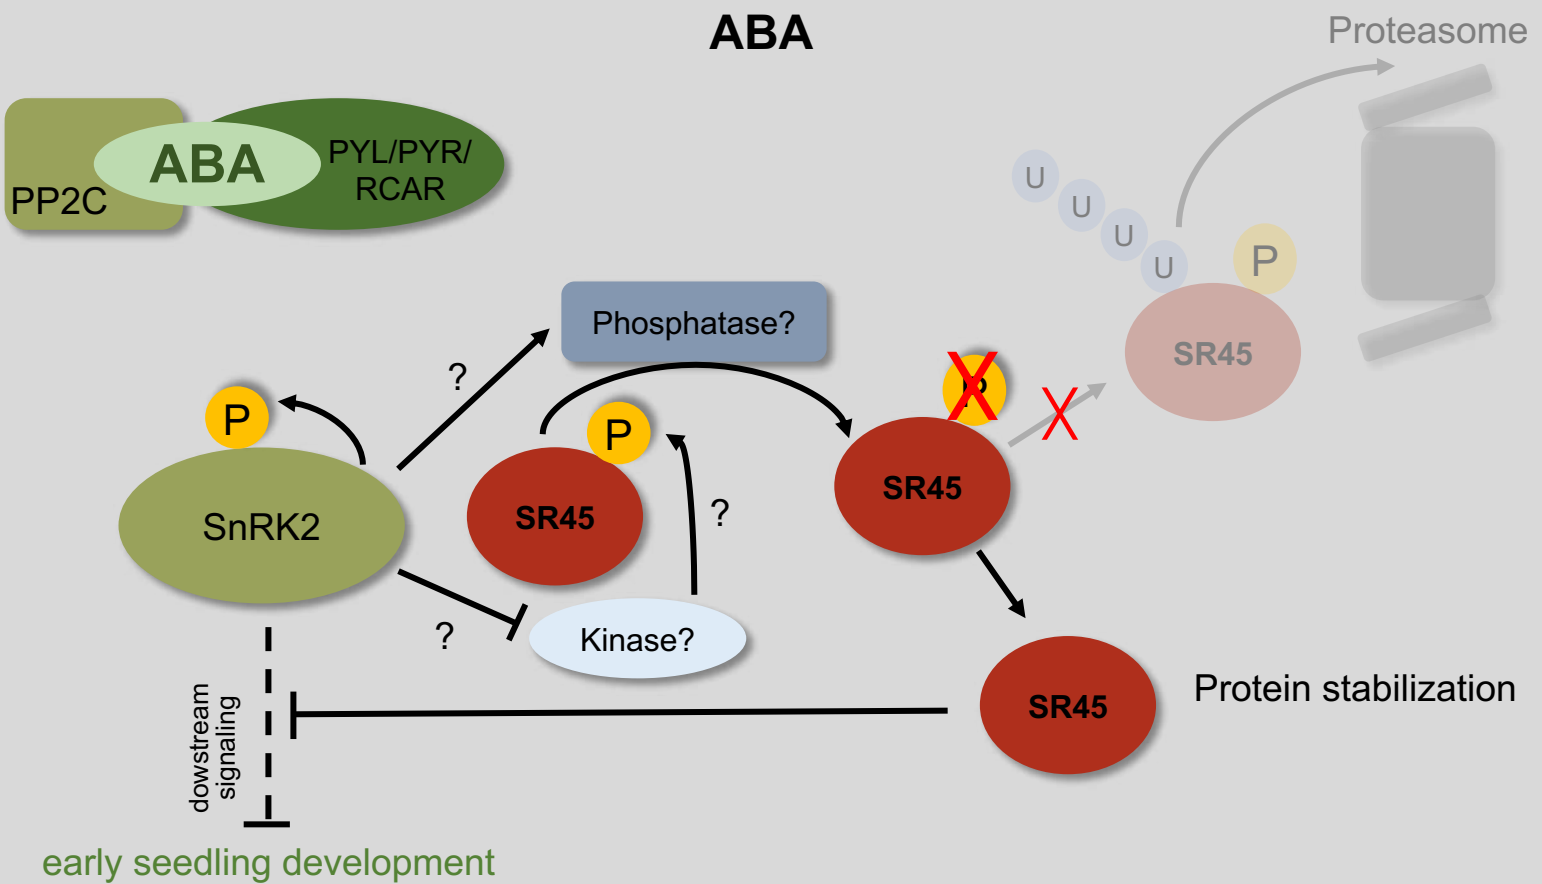

**Figure 7. Model of ABA-mediated SR45 regulation of early seedling development.**

In the absence of ABA, PP2Cs inhibit SnRK2 activity, thus blocking ABA signaling and its inhibition of early seedling development. Under these conditions, SR45 is phosphorylated by (an) unknown kinase(s), triggering SR45 ubiquitination and proteasomal degradation.

When ABA accumulates in the cell, the hormone binds to the PYL/PYR/RCAR receptors creating a complex with PP2C, thus derepressing SnRK2s that are then able to activate themselves through autophosphorylation and induce downstream signaling. ABA signaling either activates (a) phosphatase(s) or inactivates (a) kinase(s) that dephosphorylate SR45, leading to its deubiquitination and stabilization. The increase in SR45 protein levels then results in negative regulation of ABA signaling, alleviating its inhibition of early seedling development.
